# Supplementary material for: Role of mitochondria and cardiolipins in growth inhibition of breast cancer cells by retinoic acid
Source: J Exp Clin Cancer Res. 2019 Oct 29;38:436. doi: 10.1186/s13046-019-1438-y (PMC6821005; doi:10.1186/s13046-019-1438-y)
Supplement: Supplementary file 2 — Additional file 2: Table S1. Lipidomics raw data, Highthroughput lipid ID. [file 13046_2019_1438_MOESM2_ESM.xlsx]

## Sheet: Lipidomics raw data
Lipid class	o-TG/p-TG	TG																																								DG	Steryl esters					n-glyco-SP
m/z@retention time	913.7620@26.87	736.6457@22.20	812.6774@23.31	764.6764@23.34	838.6924@23.96	749.6657@24.13	840.7081@24.45	842.7214@25.02	892.7395@25.42	873.6950@25.73	829.7267@26.07	831.7438@26.24	833.7612@26.53	857.7589@26.54	859.7743@26.68	968.8642@26.76	976.8327@26.85	966.8487@26.99	1002.8487@26.99	978.8469@27.00	1004.8640@27.12	985.8191@27.15	1030.8798@27.21	1011.8354@27.24	1006.8787@27.25	970.8796@27.28	1032.8958@27.35	1058.9103@27.41	1022.9108@27.45	1015.8663@27.49	1028.9579@27.54	1060.9269@27.54	1017.8817@27.60	1062.9420@27.64	1026.9432@27.68	971.8994@27.71	1064.9567@27.74	1028.9587@27.77	1040.9576@27.77	1045.9130@27.78	1068.9873@27.94	651.5920@19.79	693.5587@25.73	697.5896@26.40	721.5892@26.41	673.5893@26.66	701.6205@27.06	862.6258@10.78	700.5733@10.80
SKBR3_48h_DMSO_luminal_HER2+_1-1	2822510	35385400	8321810	198362000	6561510	9085140	7946710	56974000	11931600	27924900	173480000	28400400	12260100	94168300	18910700	1830690	3747810	709883	0	6294500	500097	399586	0	0	1694650	261523	446050	0	0	0	390851	85767.6	90443.9	111225	0	0	0	0	213937	0	0	0	0	651202	0	1414840	0	0	0
SKBR3_48h_DMSO_luminal_HER2+_1-2	1657740	56487000	8797750	270076000	7570480	9978590	7577070	56794100	8755890	31759900	159454000	26911900	11420800	106108000	12041800	951640	2535940	335735	0	5668280	242712	671474	0	0	1245190	364367	157746	0	0	151681	403474	0	0	0	0	0	0	52813.7	16789.7	0	0	62489.8	0	0	0	460298	0	0	0
SKBR3_48h_DMSO_luminal_HER2+_1-3	1184520	38503400	4115300	209129000	4361470	7358350	5302220	37564800	8119510	16096300	141076000	18351700	8134070	81169300	13479300	1065660	1561830	0	0	3488960	0	434910	0	0	745853	0	146679	0	0	0	411160	0	0	0	0	0	0	0	204038	0	0	0	0	0	0	0	0	0	0
DMSO SKBR3 Mean	1.88826e+06	43458600	7.07829e+06	2.25856e+08	6.16449e+06	8807360	6942000	50444300	9.60233e+06	2.52604e+07	1.58003e+08	2.45547e+07	10604990	93815200	14810600	1.28266e+06	2.61519e+06	348539	0	5150580	247603	501990	0	0	1.22856e+06	208630	250158	0	0	50560.3	401828	28589.2	30148	37075	0	0	0	17604.6	144922	0	0	20829.9	0	217067	0	625046	0	0	0
DMSO SKBR3 SD	842975	1.13901e+07	2.57703e+06	3.86725e+07	1.64093e+06	1.33202e+06	1.43207e+06	1.11543e+07	2.04215e+06	8.16467e+06	1.62506e+07	5.42324e+06	2.18064e+06	1.24731e+07	3.62281e+06	478017	1.09514e+06	355115	0	1.47268e+06	250084	147836	0	0	474617	187854	169737	0	0	87573.1	10254	49517.9	52217.8	64215.8	0	0	0	30492	111076	0	0	36078.5	0	375972	0	721664	0	0	0
SKBR3_48h_ATRA_luminal_HER2+_1-4	3388300	65086700	12012500	345592000	11437000	12862600	12309800	78360700	19267200	43418300	181795000	43100500	16672200	123775000	28388300	3809260	4601520	163253	209454	8165180	651007	819277	0	342040	1969250	273744	275129	0	0	133330	656860	0	225696	141037	0	465549	0	0	203183	0	0	0	0	418428	0	0	0	0	0
SKBR3_48h_ATRA_luminal_HER2+_1-5	3692250	38663200	7525820	196972000	7509560	7604810	8244460	46530400	15478800	26742200	168879000	30547300	11048600	101940000	16841800	3023130	6226390	1003780	0	7906550	581459	748126	0	210034	2210500	475204	295814	0	0	139566	495652	0	179838	0	0	228595	0	0	138281	0	0	0	176677	0	1322520	2070550	0	0	0
SKBR3_48h_ATRA_luminal_HER2+_1-6	1334990	0	4502850	221899000	4694000	7119930	6028350	33148900	9659680	17058000	149556000	25975700	8283710	89595800	13727000	1785070	2047910	0	0	4064150	255554	446802	0	0	897624	202698	0	0	0	0	363725	0	0	104428	0	152445	0	0	177685	0	0	96104.9	0	0	237977	955309	0	0	0
ATRA SKBR3 Mean	2805180	34583300	8.01372e+06	254821000	7.88019e+06	9195780	8860870	52680000	1.48019e+07	2.90728e+07	1.66743e+08	3.32078e+07	1.20015e+07	105103600	1.96524e+07	2.87249e+06	4291940	389011	69818	6711960	496007	671402	0	184025	1692458	317215	190314	0	0	90965.3	505412	0	135178	81821.7	0	282196	0	0	173050	0	0	32035	58892.3	139476	520166	1.00862e+06	0	0	0
ATRA SKBR3 SD	1.28226e+06	3.27346e+07	3.77852e+06	7.95919e+07	3.38674e+06	3.1848e+06	3.18577e+06	2.32248e+07	4.8394e+06	1.33338e+07	1.62253e+07	8.86699e+06	4.27466e+06	1.73078e+07	7.72418e+06	1.02047e+06	2.10637e+06	538627	120928	2.29671e+06	211122	197736	0	172497	698836	141358	165141	0	0	78840	146811	0	119292	73185.7	0	163289	0	0	32698.4	0	0	55486.2	102005	241580	704973	1.0363e+06	0	0	0
t-test ATRA vs DMSO SKBR3	0.367593	0.693189	0.743282	0.611725	0.489393	0.85931	0.416608	0.890447	0.195349	0.698689	0.545778	0.236734	0.649181	0.416077	0.4018	0.0970975	0.308337	0.919475	0.42265	0.38665	0.260782	0.305218	#DIV/0!	0.205889	0.402146	0.471738	0.684223	#DIV/0!	#DIV/0!	0.584857	0.346056	0.42265	0.264848	0.471298	#DIV/0!	0.0958326	#DIV/0!	0.42265	0.709428	#DIV/0!	#DIV/0!	0.786185	0.42265	0.781042	0.329528	0.629783	#DIV/0!	#DIV/0!	#DIV/0!
HCC1500_48h_DMSO_luminal_HR+_14-1	0	0	0	0	0	0	0	897199	691324	0	3454570	0	453022	0	1245900	0	0	0	0	0	0	0	0	0	0	0	0	0	0	0	233793	0	136410	0	0	271944	0	0	352637	0	0	0	0	0	156931	0	0	0	0
HCC1500_48h_DMSO_luminal_HR+_14-2	0	0	0	0	0	0	0	753128	807580	0	4192640	754328	345914	5500810	2328110	0	133110	0	0	0	0	0	0	0	0	0	0	0	0	0	99225.3	0	0	0	0	315324	0	0	291166	0	0	0	0	0	141041	0	0	0	0
HCC1500_48h_DMSO_luminal_HR+_14-3	72448.2	0	0	0	0	0	0	890479	799479	0	3626720	396905	490309	6510430	754567	0	0	0	0	0	0	0	0	0	88067.1	42302.5	0	0	0	90605.2	0	0	160660	0	0	0	0	91820.6	213862	0	0	0	0	0	0	0	0	0	0
DMSO HCC1500 Mean	24149.4	0	0	0	0	0	0	846935	766128	0	3.75798e+06	383744	429748	4.00375e+06	1442859	0	44370	0	0	0	0	0	0	0	29355.7	14100.8	0	0	0	30201.7	111006	0	99023.3	0	0	195756	0	30606.9	285888	0	0	0	0	0	99324	0	0	0	0
DMSO HCC1500 SD	41828	0	0	0	0	0	0	81309	64908.4	0	386145	377336	74958.2	3.5039e+06	805049	0	76851.1	0	0	0	0	0	0	0	50845.6	24423.4	0	0	0	52310.9	117341	0	86609.6	0	0	170912	0	53012.6	69537.9	0	0	0	0	0	86383.2	0	0	0	0
HCC1500_48h_ATRA_luminal_HR+_14-4	200061	0	0	0	0	0	0	647936	594448	0	0	0	585209	0	1156490	0	0	0	0	0	0	0	0	0	110595	431220	0	0	0	0	241909	0	0	0	0	0	0	266630	431403	77686.9	153638	0	0	0	0	0	0	0	0
HCC1500_48h_ATRA_luminal_HR+_14-5	0	0	91267.8	0	0	0	0	693836	640517	0	5090520	1150480	679858	8137730	3404770	0	0	0	0	0	0	0	0	0	0	190255	0	0	0	0	334180	0	0	0	183779	275951	0	0	225911	0	125195	0	0	0	0	0	0	0	0
HCC1500_48h_ATRA_luminal_HR+_14-6	0	0	0	0	0	0	0	811815	642510	0	5273120	513261	682387	8871690	1900160	0	0	0	0	79185.9	0	0	0	0	71371.4	68953.7	0	0	0	0	203583	0	245885	0	0	306629	0	319122	345261	0	0	0	0	0	0	0	0	0	0
ATRA HCC1500 Mean	66687	0	30422.6	0	0	0	0	717862	625825	0	3.45455e+06	554580	649151	5.66981e+06	2.15381e+06	0	0	0	0	26395.3	0	0	0	0	60655.5	230143	0	0	0	0	259891	0	81961.7	0	61259.7	194193	0	195251	334192	25895.6	92944.3	0	0	0	0	0	0	0	0
ATRA HCC1500 SD	115505	0	52693.5	0	0	0	0	84540.1	27191.5	0	2.99312e+06	576352	55390.1	4.92389e+06	1.1454e+06	0	0	0	0	45718	0	0	0	0	56070.8	184398	0	0	0	0	67129.7	0	141962	0	106105	168874	0	171117	103192	44852.6	81738.8	0	0	0	0	0	0	0	0
t-test ATRA vs DMSO HCC1500	0.598318	#DIV/0!	0.42265	#DIV/0!	#DIV/0!	#DIV/0!	#DIV/0!	0.129454	0.0485112	#DIV/0!	0.877325	0.692989	0.0178639	0.660445	0.434043	#DIV/0!	0.42265	#DIV/0!	#DIV/0!	0.42265	#DIV/0!	#DIV/0!	#DIV/0!	#DIV/0!	0.513792	0.177581	#DIV/0!	#DIV/0!	#DIV/0!	0.42265	0.147197	#DIV/0!	0.869289	#DIV/0!	0.42265	0.991552	#DIV/0!	0.23245	0.543047	0.42265	0.187719	#DIV/0!	#DIV/0!	#DIV/0!	0.184662	#DIV/0!	#DIV/0!	#DIV/0!	#DIV/0!
CAMA1_48h_DMSO_luminal_HR+_4-1	1854520	0	0	0	0	0	0	865384	962517	258307	17983200	2672090	3803060	44934700	15168800	1060420	4274100	0	0	7801200	3151640	1593440	0	885320	4082070	2125970	1659640	192090	65506	772314	1489510	738060	1062820	874576	207894	819938	373337	598800	1422690	199077	197278	0	0	0	149766	3817930	931719	0	0
CAMA1_48h_DMSO_luminal_HR+_4-2	1623840	0	0	0	0	0	0	858927	812700	320486	17717600	2149920	3266310	47868300	10529900	0	4537490	0	0	8623850	2234340	1215630	0	491774	4925950	1924130	1363710	470443	0	364331	1282050	738271	934056	749712	0	461206	287857	295190	1439980	95303.4	190808	253837	0	0	0	3946030	1113540	0	0
CAMA1_48h_DMSO_luminal_HR+_4-3	1361000	0	0	0	0	0	0	845542	962291	73121.1	6444730	1837010	2046280	22429100	8293980	178721	2369150	0	0	3384620	785064	214678	0	149947	2007290	1288330	561731	0	0	183947	569772	246574	552679	115085	0	467899	139795	426883	944761	95494.2	155461	281155	0	0	258339	6161340	1023360	0	0
DMSO CAMA1 Mean	1613120	0	0	0	0	0	0	856618	912503	217305	14048510	2.21967e+06	3038550	38410700	1.13309e+07	413047	3.72691e+06	0	0	6.60322e+06	2.05701e+06	1007916	0	509014	3671770	1.77948e+06	1195027	220844	21835.3	440197	1.11378e+06	574302	849852	579791	69298	583014	266996	440291	1.26914e+06	129958	181182	178331	0	0	136035	4.64177e+06	1022873	0	0
DMSO CAMA1 SD	246935	0	0	0	0	0	0	10120.6	86431.7	128679	6.58641e+06	421887	900264	1.3918e+07	3.50671e+06	567718	1.18321e+06	0	0	2.81758e+06	1.19321e+06	712464	0	367989	1.50197e+06	437154	568059	236536	37819.9	301431	482407	283821	265290	407261	120028	205209	118160	152248	281057	59858.7	22509	155042	0	0	129716	1.31755e+06	90911.5	0	0
CAMA1_48h_ATRA_luminal_HR+_4-4	1921320	0	0	0	0	0	0	592039	792716	343238	76361800	6961810	23846100	159170000	25061800	0	0	0	0	2743140	0	0	0	0	982083	1510380	0	0	0	0	757400	0	0	0	0	845991	0	169764	536549	0	0	917934	0	0	0	1892660	0	0	0
CAMA1_48h_ATRA_luminal_HR+_4-5	2370310	0	0	10859900	0	338027	113749	1513830	1010660	1739220	145132000	12425100	44307500	197721000	55658000	0	6288930	0	0	11506100	1688360	0	0	0	2897430	7410750	1475210	0	0	259040	1669250	0	1080880	197491	338815	1066340	0	1157080	982676	164800	140682	550874	0	0	0	0	0	0	0
CAMA1_48h_ATRA_luminal_HR+_4-6	2841510	0	0	0	0	0	0	510953	1165220	702715	91368100	7074940	30343600	194024000	32517200	0	0	0	0	2986540	0	0	0	0	1141010	1301840	0	0	0	0	671392	0	260756	0	170939	995892	0	511229	485114	0	0	1279070	0	0	0	4456060	0	0	0
ATRA CAMA1 Mean	2.37771e+06	0	0	3.61997e+06	0	112676	37916.3	872274	989532	928391	104287300	8.82062e+06	32832400	1.83638e+08	3.77457e+07	0	2096310	0	0	5745260	562787	0	0	0	1.67351e+06	3.40766e+06	491737	0	0	86346.7	1.03268e+06	0	447212	65830.3	169918	969408	0	612691	668113	54933.3	46894	915959	0	0	0	2116240	0	0	0
ATRA CAMA1 SD	460140	0	0	6.26997e+06	0	195160	65673	557081	187149	724837	3.61596e+07	3.12209e+06	1.04553e+07	2.12707e+07	1.59541e+07	0	3.63092e+06	0	0	4.99052e+06	974775	0	0	0	1.06292e+06	3.46835e+06	851713	0	0	149557	552960	0	564048	114021	169410	112537	0	501417	273631	95147.3	81222.8	364102	0	0	0	2.23643e+06	0	0	0
t-test ATRA vs DMSO CAMA1	0.0832399	#DIV/0!	#DIV/0!	0.42265	#DIV/0!	0.42265	0.42265	0.965603	0.566358	0.228892	0.0455927	0.0646681	0.0378158	0.00119068	0.0968699	0.334727	0.52468	#DIV/0!	#DIV/0!	0.811399	0.171141	0.133902	#DIV/0!	0.138837	0.140986	0.50225	0.308794	0.247241	0.42265	0.168333	0.857686	0.0726511	0.34874	0.152515	0.453298	0.0620634	0.059516	0.618303	0.0567922	0.323033	0.0941637	0.0558886	#DIV/0!	#DIV/0!	0.21095	0.183757	0.00262278	#DIV/0!	#DIV/0!
MDA-MB361_48h_DMSO_luminal_HER2+_2-1	1473770	0	48419.6	0	0	0	837940	10243700	2163330	482406	11377500	1804400	4019260	9657490	1942000	2362880	2664470	709385	704027	4541160	1107070	2137900	172728	420562	2357490	1194180	271435	0	0	645659	378385	0	682306	103988	247427	0	157627	0	1129950	0	198648	0	0	585402	0	638999	0	0	51398.8
MDA-MB361_48h_DMSO_luminal_HER2+_2-2	2360410	16816400	302511	48447800	138433	244728	1019100	15385800	2687730	999420	26648000	4079350	1442420	20306900	2850880	3556060	5045110	1205940	754003	8825230	2335770	3617700	331910	695223	3879460	2348940	1167200	409989	0	1085860	534978	329576	1111310	280514	155644	1411050	291925	0	1709670	153754	238184	0	0	478219	0	200066	0	0	108997
MDA-MB361_48h_DMSO_luminal_HER2+_2-3	2498110	19007800	338510	56355500	69161.9	350602	1082010	15649200	2606440	798464	29974900	5584330	3999560	26985800	4779910	4599210	5012030	1263130	765597	9409950	1961400	4278310	288457	740343	3987260	1995020	857046	102836	0	1055640	655327	343847	1408470	357126	242925	1025910	317399	291855	2428220	159577	211465	0	0	528781	0	0	0	0	91210.5
DMSO MDAMB361 Mean	2.11076e+06	11941400	229814	3.49344e+07	69198.3	198443	979683	1.37596e+07	2.48583e+06	760097	22666800	3.82269e+06	3.15375e+06	1.89834e+07	3190930	3506050	4.24054e+06	1059485	741209	7.59211e+06	1.80141e+06	3.34464e+06	264365	618709	3408070	1.84605e+06	765227	170942	0	929053	522897	224474	1067362	247209	215332	812320	255650	97285	1.75595e+06	104444	216099	0	0	530801	0	279688	0	0	83868.8
DMSO MDAMB361 SD	555932	1.03994e+07	158120	3.05114e+07	69216.5	179825	126719	3.04768e+06	282238	260634	9.91732e+06	1.90299e+06	1.48209e+06	8.73964e+06	1.44919e+06	1.119e+06	1.36501e+06	304541	32718.2	2.65833e+06	629780	1.09602e+06	82280.3	173077	911424	591619	454887	213311	0	245891	138866	194531	365071	129814	51740.3	729370	85840.9	168503	650371	90497.7	20171.2	0	0	53620	0	326856	0	0	29492.6
MDA-MB361_48h_ATRA_luminal_HER2+_2-4	3221470	20279000	309395	55050100	402616	192682	1050250	10429000	2632890	995172	30639100	2019730	4438550	26631200	5427680	3274500	3084020	1435830	535447	5464430	1320490	1819900	139556	191334	1738530	2958110	316656	0	0	534827	570115	0	1005430	0	536959	2636340	171392	276695	1097540	131375	241054	0	0	307629	0	863390	0	74244	146517
MDA-MB361_48h_ATRA_luminal_HER2+_2-5	4322820	65587400	1203510	170529000	1043570	1995960	2107080	26764600	6345580	2518350	75432400	12397700	8222720	56658700	8633160	6702250	7329090	3477030	1437080	11647300	2275220	3920900	497963	781713	4078100	5735910	1076320	0	0	1013200	1441660	113185	1638230	225586	697364	1812510	584311	492443	2376440	263889	217556	0	0	0	0	0	0	106347	275056
MDA-MB361_48h_ATRA_luminal_HER2+_2-6	2887210	13937900	235118	37994100	110740	387639	693728	7364880	1917030	872202	31765700	1366090	5740030	30437900	3279260	2382060	2392180	1367050	0	4093880	730861	1498950	0	280463	1765270	3061850	543563	0	0	511640	651771	0	717202	0	103697	2816320	0	36355.9	703467	0	0	0	0	166286	0	800892	0	0	179961
ATRA MDAMB361 Mean	3.47717e+06	33268100	582674	8.78577e+07	518975	858760	1283686	1.48528e+07	3.63183e+06	1461908	4.59457e+07	5.26117e+06	6.13377e+06	3.79093e+07	5.78003e+06	4.1196e+06	4268430	2.0933e+06	657509	7.06854e+06	1.44219e+06	2413250	212506	417837	2527300	3.91862e+06	645513	0	0	686556	887849	37728.3	1.12029e+06	75195.3	446007	2.42172e+06	251901	268498	1.39248e+06	131755	152870	0	0	157972	0	554761	0	60197	200511
ATRA MDAMB361 SD	751185	2.81683e+07	538941	7.21015e+07	477177	989656	735024	1.0429e+07	2.37727e+06	916969	2.55424e+07	6.18905e+06	1.92257e+06	1.63487e+07	2.69429e+06	2.28071e+06	2.67309e+06	1.19884e+06	726274	4.0241e+06	779339	1.31549e+06	256872	318262	1.3431e+06	1.57467e+06	389959	0	0	283120	481349	65347.4	471134	130242	307106	535214	300360	228154	874616	131945	132910	0	0	153983	0	481452	0	54547.3	66688.1
t-test ATRA vs DMSO MDAMB361	0.0697626	0.320474	0.375721	0.33475	0.242563	0.367138	0.549772	0.875592	0.492155	0.314965	0.251147	0.73218	0.105091	0.173461	0.237011	0.70466	0.988175	0.271111	0.860312	0.861333	0.569657	0.401071	0.765962	0.405885	0.407198	0.138186	0.747112	0.299534	#DIV/0!	0.32653	0.318573	0.232931	0.885654	0.180502	0.322202	0.0413782	0.985064	0.359501	0.596901	0.784007	0.497568	#DIV/0!	#DIV/0!	0.0405102	#DIV/0!	0.464714	#DIV/0!	0.196106	0.0765933
HCC202_48h_DMSO_luminal_HER2+_11-1	260999	0	134012	30581600	299391	107717	577230	6653740	1760120	1537470	67016700	4350770	6137420	70217100	13050000	3188500	4241840	2306610	1154000	11581900	3078160	5279610	1580700	1761310	8412580	10594400	3159240	1208280	1821180	5684690	6217760	1849610	11760300	3808330	8539060	2330960	6155130	7045680	26492200	5433150	8926360	0	0	0	0	0	0	0	0
HCC202_48h_DMSO_luminal_HER2+_11-2	436260	7346790	156760	26300700	0	105468	360127	5757290	1793920	1321040	61525300	3810090	5407020	70180500	9759240	3866550	3327380	2818210	385231	9228090	2828700	5347560	753444	1436670	6665300	8642000	3093890	744716	1821470	4596860	4459250	1991050	9327550	4415330	7766740	2020670	6498230	7321840	25310300	5167720	10076200	0	0	461607	0	0	0	0	0
HCC202_48h_DMSO_luminal_HER2+_11-3	0	11571000	442582	43206700	153703	277175	811616	8794650	2350690	2131980	85907700	6054590	7928390	98497000	10816400	4469840	6424410	2139650	745300	12386300	3055860	6963590	746796	2254820	8613410	10526700	3141800	891053	1861920	6379810	6717040	2592900	12615800	3873030	8521520	2123480	7229930	6569920	26453700	5180180	11747700	0	0	0	0	0	0	0	0
DMSO HCC202 Mean	232420	6305930	244451	33363000	151031	163453	582991	7068560	1.96824e+06	1.6635e+06	7.14832e+07	4.73848e+06	6.49094e+06	7.96315e+07	1.12085e+07	3841630	4.66454e+06	2421490	761510	11065430	2.98757e+06	5.86359e+06	1026980	1817600	7.8971e+06	9.92103e+06	3.13164e+06	948016	1.83486e+06	5.55379e+06	5.79802e+06	2144520	11234550	4032230	8.27577e+06	2158370	6.62776e+06	6.97915e+06	26085400	5260350	1.02501e+07	0	0	153869	0	0	0	0	0
DMSO HCC202 SD	219530	5.8553e+06	171963	8.7895e+06	149713	98492.3	225800	1.56059e+06	331639	419902	1.27901e+07	1.1714e+06	1.29733e+06	1.6338e+07	1.68006e+06	641033	1.5912e+06	353566	384641	1.64123e+06	138039	953236	479547	411969	1.07148e+06	1.10819e+06	33838.2	236974	23438	898654	1.18598e+06	394696	1.70601e+06	333348	440923	158060	548984	380350	671532	149779	1.41869e+06	0	0	266509	0	0	0	0	0
HCC202_48h_ATRA_luminal_HER2+_11-4	1055220	27730000	895096	89955600	1295310	824325	1711950	13491900	3353670	2539590	99670600	11704400	8584000	98873900	20689900	6557700	7588250	4020900	1498390	19816900	5456240	9516730	1314460	2940570	13170800	16007900	4443360	1021250	2584460	8217260	7949410	3104700	14419000	5697810	12096000	3362690	9677740	14389800	42988100	6894850	15507100	117191	0	0	0	0	0	74045.5	205583
HCC202_48h_ATRA_luminal_HER2+_11-5	956830	16238800	439143	53610000	161228	431864	983686	8009500	2081170	1516770	67117000	5694700	6082440	67082300	11478800	5703100	4098480	3380980	1173660	10959200	4046500	5340830	843502	1819380	7836680	11091200	3020140	813125	1586450	5804630	6203300	2003130	11299400	3588640	7775260	1591150	5626440	6525900	21953200	4800130	9636490	0	0	0	0	0	0	0	151578
HCC202_48h_ATRA_luminal_HER2+_11-6	1925370	16208600	308579	53508700	409522	474001	815424	7612380	2099370	1032310	71260000	7298770	6250150	80956800	15996700	5209420	4484040	3055850	453211	11433900	2726710	6398030	918018	1341960	8022610	10502200	3341750	957386	2094360	5390990	5731150	1958460	10010700	3662150	8907850	2168760	6242700	9562240	28339800	5421290	11147200	152486	0	0	0	0	0	0	122538
ATRA HCC202 Mean	1.31247e+06	2.00591e+07	547606	6.56914e+07	622020	576730	1.17035e+06	9.70459e+06	2.5114e+06	1.69622e+06	79349200	8.23262e+06	6.9722e+06	8.23043e+07	1.60551e+07	5.82341e+06	5.39026e+06	3485910	1.04175e+06	14070000	4.07648e+06	7.0852e+06	1.02533e+06	2033970	9.6767e+06	1.25338e+07	3601750	930587	2.08842e+06	6470960	6.62795e+06	2355430	11909700	4316200	9.59304e+06	2374200	7.18229e+06	1.01593e+07	31093700	5.70542e+06	12096930	89892.3	0	0	0	0	0	24681.8	159900
ATRA HCC202 SD	533059	6.64318e+06	307935	2.10134e+07	596156	215456	476522	3.28591e+06	729481	769497	1.77203e+07	3.11178e+06	1.39838e+06	1.59386e+07	4.60583e+06	682144	1.91326e+06	491007	534929	4.98262e+06	1.36501e+06	2.1711e+06	253154	820625	3.02741e+06	3.02307e+06	746384	106619	499031	1.52642e+06	1.16851e+06	649271	2.26663e+06	1.19707e+06	2.24038e+06	903462	2.18298e+06	3.9658e+06	1.07845e+07	1.07588e+06	3.04836e+06	79824.2	0	0	0	0	0	42750.2	42143.3
t-test ATRA vs DMSO HCC202	0.0564933	0.0555703	0.229453	0.1012	0.303009	0.0618989	0.153919	0.302241	0.330715	0.952395	0.569936	0.18205	0.684794	0.849177	0.202357	0.0215932	0.640869	0.0432398	0.506031	0.409501	0.300694	0.443486	0.996115	0.711003	0.420726	0.270189	0.389207	0.915397	0.471711	0.431448	0.436624	0.660767	0.702851	0.725882	0.416418	0.721042	0.706978	0.298867	0.505765	0.549086	0.415457	0.190408	#DIV/0!	0.42265	#DIV/0!	#DIV/0!	#DIV/0!	0.42265	0.0223804
MBA-MD175VII_48h_DMSO_luminal_HR+_15-1	3553250	45613200	2174940	83363000	2456670	200968	2983000	20694500	6121640	2271030	48270100	11756900	5832580	61139800	20668400	12620900	12079200	5986620	2359090	25567700	5682870	10284300	411344	2145840	10722100	9421410	2458640	570606	1093080	4501570	3829910	1098160	6831910	1129090	2222720	796935	1940420	2304400	10047800	2083380	2191190	0	0	0	0	0	0	591353	1317570
MBA-MD175VII_48h_DMSO_luminal_HR+_15-2	2729430	36484400	1544830	68669700	1678850	213090	2296460	16690500	5181820	959464	40096500	8260380	5339170	61355700	14023100	9976520	8748340	5868310	1706500	19109100	3232170	7312640	307138	1680760	8092400	9024130	1733790	188002	583812	3452870	3042050	727230	5019310	979389	2059070	428949	1592820	2500520	8207230	1289320	1942610	0	98960.9	0	0	0	0	642605	1139090
MBA-MD175VII_48h_DMSO_luminal_HR+_15-3	3991430	0	1917700	66036200	2066690	239128	2231080	17295300	5773520	1178970	42474800	9891280	4275100	60134900	17998500	9536990	12558300	5319290	2287620	22241300	4497320	8288610	736863	1568450	10082800	9064310	1908290	706257	737778	4252480	3187270	705294	5634400	929378	2613180	838196	1595220	2222270	7718390	1437970	1690590	0	0	0	0	0	0	586251	1114820
DMSO MDAMB175VII Mean	3.4247e+06	2.73659e+07	1.87916e+06	7.26896e+07	2.0674e+06	217729	2.50351e+06	1.82268e+07	5.69233e+06	1.46982e+06	43613800	9969520	5148950	60876800	1.75633e+07	10711470	1.11286e+07	5724740	2.11774e+06	2.2306e+07	4.47079e+06	8.62852e+06	485115	1798350	9.63243e+06	9169950	2.03357e+06	488288	804890	4.06897e+06	3.35308e+06	843561	5828540	1012619	2.29832e+06	688027	1.70949e+06	2.3424e+06	8.65781e+06	1.60356e+06	1.94146e+06	0	32987	0	0	0	0	606736	1.19049e+06
DMSO MDAMB175VII SD	640745	2.41351e+07	316818	9.33672e+06	388910	19498.3	416532	2.15841e+06	475142	702494	4.20416e+06	1.74957e+06	795973	651510	3.34395e+06	1.66815e+06	2.07525e+06	356078	357930	3.22979e+06	1.22557e+06	1.51471e+06	224160	306130	1.37148e+06	218695	378317	268755	261183	547904	419285	220762	921763	103920	284686	225314	199998	142964	1.22833e+06	422134	250302	0	57135.1	0	0	0	0	31167.7	110719
MBA-MD175VII_48h_ATRA_luminal_HR+_15-4	5195710	48089000	2204970	90230100	2394440	197374	2700750	17118500	5218880	1958280	49030700	8898160	6997290	71749600	14103900	8382200	10849400	6652480	1301020	19919600	4308090	8514600	772438	1436150	8288090	11613100	1737260	138475	738866	4223450	4193280	724986	7082300	746252	2960420	1191760	1536220	2732920	8931240	1815300	2007360	0	161954	0	0	0	0	698401	1418760
MBA-MD175VII_48h_ATRA_luminal_HR+_15-5	4811600	50657300	2296220	95123700	2559670	302521	2766390	18149300	5307770	1613490	52543600	10840300	7086710	77207800	15145500	7755550	8673480	5232290	1262260	23233300	4035740	8478470	845669	1241570	8779870	10890100	1978970	182015	827399	4662420	4158200	873868	6565430	1338230	3645650	1276730	2059770	3269450	9960310	2139290	2187050	181727	0	0	0	0	0	777355	1607910
MBA-MD175VII_48h_ATRA_luminal_HR+_15-6	5776680	42640200	2040590	77138800	2487670	235951	2790900	15211900	5817460	1609280	45749800	7910630	7701810	73463600	15825600	9108370	9753470	5797710	1004320	21271500	4579450	7285060	964376	1731880	10726400	12760800	2040500	0	379462	3507360	3218190	906902	6127640	1289330	2784850	1125930	1568810	2260510	7976780	1627480	2171620	0	171306	0	0	0	0	723317	1297790
ATRA MDAMB175VII Mean	5261330	4.71288e+07	2.18059e+06	8.74975e+07	2.48059e+06	245282	2752680	1.68266e+07	5.44804e+06	1.72702e+06	4.9108e+07	9.21636e+06	7.26194e+06	7.41403e+07	15025000	8.41537e+06	9.75878e+06	5894160	1189200	21474800	4307760	8092710	860828	1.46987e+06	9.26479e+06	1.17547e+07	1918910	106830	648576	4.13108e+06	3.85656e+06	835252	6591790	1124604	3.13031e+06	1198140	1721600	2.75429e+06	8956110	1860690	2122010	60575.7	111087	0	0	0	0	733024	1.44149e+06
ATRA MDAMB175VII SD	485875	4.09389e+06	129547	9.29862e+06	82842	53190.9	46612.5	1.4903e+06	323002	200291	3.39756e+06	1.49053e+06	383556	2.79132e+06	867152	677020	1.08797e+06	714991	161279	1.66618e+06	271855	699679	96862.7	246888	1.28946e+06	943351	160294	95044.3	237226	583044	553120	96911.1	477876	328573	454852	75602.2	293317	504809	991999	258906	99589.1	104920	96317.4	0	0	0	0	40362.2	156304
t-test ATRA vs DMSO MDAMB175VII	0.0191639	0.2906	0.236109	0.123468	0.203114	0.471752	0.409131	0.413561	0.507454	0.596328	0.156273	0.60139	0.0276228	0.0111734	0.317992	0.126266	0.385339	0.738227	0.0303934	0.71853	0.84125	0.61918	0.0843132	0.224592	0.752229	0.0359118	0.665343	0.121051	0.486036	0.899569	0.28193	0.956477	0.29256	0.621808	0.0661626	0.0475871	0.956065	0.290996	0.760583	0.428914	0.340557	0.42265	0.30752	#DIV/0!	#DIV/0!	#DIV/0!	#DIV/0!	0.0145703	0.0931045
ZR75-1_48h_DMSO_luminal_HR+_12-1	1127000	0	0	0	0	48243.5	0	1576460	855287	0	23004200	4330530	2558110	32044400	6509310	1365490	1904350	471501	0	4106300	1261400	2652180	0	513010	2408380	2052710	750916	153899	0	1813220	2181290	678725	3130410	1038330	556339	575991	2044190	656612	6414590	1092230	2509570	0	0	0	0	0	0	0	0
ZR75-1_48h_DMSO_luminal_HR+_12-2	1215690	0	0	0	0	0	0	1678600	943221	0	20095100	2746220	2183410	25887400	6083570	2065650	1815940	540067	0	5001240	1092610	2835400	0	453112	2734520	1844130	676172	133649	110456	1952050	1754060	584252	2957320	1294280	481444	469182	2372210	1225330	6666720	879663	2240930	0	0	0	0	0	0	0	0
ZR75-1_48h_DMSO_luminal_HR+_12-3	834803	0	43993.8	0	0	0	0	1325690	628551	112686	18905700	3433040	1937980	24995700	6218880	1230200	1515380	264939	0	4341490	844825	2248660	0	472147	2691640	2048390	416978	0	0	1649050	1501270	796891	2923240	1491700	469695	409262	2062700	356825	3674520	759215	1850050	0	0	0	0	0	181130	0	0
DMSO ZR751 Mean	1.05916e+06	0	14664.6	0	0	16081.2	0	1.52692e+06	809020	37562	2.06683e+07	3.50326e+06	2226500	27642500	6.27059e+06	1553780	1.74522e+06	425502	0	4483010	1.06628e+06	2.57875e+06	0	479423	2.61151e+06	1.98174e+06	614689	95849.3	36818.7	1.80477e+06	1.81221e+06	686623	3.00366e+06	1274770	502493	484812	2159700	746256	5.58528e+06	910369	2.20018e+06	0	0	0	0	0	60376.7	0	0
DMSO ZR751 SD	199299	0	25399.8	0	0	27853.4	0	181596	162357	65059.3	2.10852e+06	794486	312303	3.83814e+06	217529	448424	203900	143216	0	463951	209532	300184	0	30604.7	177220	119196	175254	83623.2	63771.8	151676	343719	106539	111086	227314	47000.9	84456.2	184272	441137	1.65956e+06	168618	331643	0	0	0	0	0	104575	0	0
ZR75-1_48h_ATRA_luminal_HR+_12-4	1237350	0	0	0	0	0	5263.72	2480860	808944	145928	20571000	3635230	1903620	28050800	4373000	1876060	2074020	420725	0	4296020	896621	1701520	0	400228	1990780	1313240	816281	0	0	1119050	1345660	365671	2377170	400713	559130	512618	997124	543515	4608620	604115	1363960	0	0	0	0	295061	0	0	0
ZR75-1_48h_ATRA_luminal_HR+_12-5	750221	0	0	0	0	0	0	1106350	735565	0	6974200	1059870	765660	10488000	2921710	409108	827747	0	0	1516000	374051	913478	0	0	1066790	495770	133154	0	0	475360	486026	99190.5	884290	282355	0	525497	343316	468669	1876740	396018	532694	0	0	160578	0	448729	0	0	0
ZR75-1_48h_ATRA_luminal_HR+_12-6	966019	0	99209.1	0	0	0	0	1917350	941699	198217	18496200	2942920	1825300	22732200	4294270	1386470	1540680	496352	0	3631590	821945	2171550	329390	208886	2025590	1999700	586398	82360.7	0	1012230	1018920	388531	2027910	648226	193098	268895	1240760	245975	2769690	467060	1151740	0	0	0	0	0	0	0	0
ATRA ZR751 Mean	984530	0	33069.7	0	0	0	1754.57	1.83485e+06	828736	114715	1.53471e+07	2.54601e+06	1.49819e+06	2.04237e+07	3.86299e+06	1.22388e+06	1.48082e+06	305692	0	3147870	697539	1595516	109797	203038	1.69439e+06	1269570	511944	27453.6	0	868880	950202	284464	1.76312e+06	443765	250743	435670	860400	419386	3.08502e+06	489064	1.01613e+06	0	0	53526	0	247930	0	0	0
ATRA ZR751 SD	244091	0	57278.4	0	0	0	3039.01	690959	104483	102729	7.32501e+06	1.33277e+06	635600	9.00611e+06	816125	746869	625289	267424	0	1.45176e+06	282626	635700	190173	200178	543793	752915	347596	47551	0	344958	433917	160858	780869	186696	283987	144575	464081	154771	1.39297e+06	105779	431906	0	0	92709.8	0	228047	0	0	0
t-test ATRA vs DMSO ZR751	0.703457	#DIV/0!	0.648799	#DIV/0!	#DIV/0!	0.42265	0.42265	0.524845	0.86959	0.343788	0.334978	0.357877	0.175648	0.300197	0.029403	0.555036	0.547091	0.542152	#DIV/0!	0.247834	0.14968	0.0984884	0.42265	0.136215	0.0881126	0.241147	0.679072	0.301594	0.42265	0.0276023	0.057296	0.0286553	0.107785	0.00888091	0.262785	0.643981	0.0271833	0.328401	0.118404	0.0289458	0.0220971	#DIV/0!	#DIV/0!	0.42265	#DIV/0!	0.20039	0.42265	#DIV/0!	#DIV/0!
HCC1419_48h_DMSO_luminal_HER2+_8-1	4637800	194958000	1023660	687406000	1110480	8471980	3630270	15458200	4714110	0	198806000	52182500	17788000	123594000	27312100	0	295932	0	0	1188480	0	0	0	0	404944	1619370	189854	0	0	0	2400230	0	485943	0	96653.3	345731	0	363353	162379	0	0	0	0	0	0	0	0	212068	468111
HCC1419_48h_DMSO_luminal_HER2+_8-2	4296140	134802000	636042	487607000	919926	6153100	1626440	10906100	5616060	719531	174895000	47779700	18309400	130174000	28605800	0	901890	0	0	1358060	0	234467	0	0	564234	1446230	224958	0	0	0	3267990	0	604402	0	0	624138	0	682725	369482	0	61963.2	296278	0	0	0	917994	0	333507	653727
HCC1419_48h_DMSO_luminal_HER2+_8-3	7858860	291633000	1857990	1081140000	2401600	13709800	5740320	25044000	8093500	1790070	272024000	94916400	27320300	169095000	50105900	0	1405190	0	0	2082440	0	535064	0	0	568930	2710630	354575	0	0	106578	5574110	0	938331	0	138091	970671	0	1293390	746017	0	166137	0	0	0	0	0	0	424580	860811
DMSO HCC1419 Mean	5597600	207131000	1172564	752051000	1.47734e+06	9444960	3.66568e+06	17136100	6.14122e+06	836534	2.15242e+08	6.49595e+07	2.11392e+07	1.40954e+08	3.53413e+07	0	867671	0	0	1.54299e+06	0	256510	0	0	512703	1925410	256462	0	0	35526	3.74744e+06	0	676225	0	78248.1	646847	0	779823	425959	0	76033.4	98759.3	0	0	0	305998	0	323385	660883
DMSO HCC1419 SD	1.96575e+06	7.9121e+07	624435	3.02001e+08	806087	3.87117e+06	2.05717e+06	7.21676e+06	1.74983e+06	900752	5.06074e+07	2.60366e+07	5.35931e+06	2.45916e+07	1.28029e+07	0	555420	0	0	474807	0	268212	0	0	93351.3	685509	86762	0	0	61532.8	1.64036e+06	0	234590	0	70861.4	313088	0	472560	295889	0	83957.5	171056	0	0	0	530004	0	106617	196448
HCC1419_48h_ATRA_luminal_HER2+_8-4	4840110	512863000	3958650	1535570000	4340890	19184400	9059030	37452300	12057400	2080510	246393000	90607800	24808700	157998000	44845000	481739	694457	0	0	2977050	533854	418814	0	0	1088350	3019380	269656	0	0	129733	3380200	0	870159	0	0	919635	0	1065270	661064	88131.5	151811	0	0	0	0	0	0	254751	532701
HCC1419_48h_ATRA_luminal_HER2+_8-5	5500730	308828000	2960860	932279000	3061800	11043600	5153510	26312700	12753900	1805800	214151000	72741000	18264700	157725000	39717500	0	1358800	0	0	2704740	634461	435738	0	0	932719	1681260	328352	0	0	0	3679230	0	737565	0	131605	569670	0	631995	481563	0	0	229955	0	0	0	1330500	0	207217	509206
HCC1419_48h_ATRA_luminal_HER2+_8-6	5889440	274271000	2508490	826248000	2492560	10548900	6024010	21686000	8144190	1139980	218035000	62853700	19582900	142979000	29567700	377619	1378170	0	0	2315510	306622	0	0	0	817669	2013160	312213	0	0	144008	3353860	0	776789	0	123281	585714	0	647705	479962	0	0	502158	0	0	0	1633320	0	202790	407534
ATRA HCC1419 Mean	5.41009e+06	3.65321e+08	3.14267e+06	1.09803e+09	3.29842e+06	13592300	6.74552e+06	2.84837e+07	1.09852e+07	1675430	226193000	7.54008e+07	2.08854e+07	1.52901e+08	38043400	286453	1143809	0	0	2.66577e+06	491646	284851	0	0	946246	2.23793e+06	303407	0	0	91247	3.4711e+06	0	794838	0	84962	691673	0	781657	540863	29377.2	50603.7	244038	0	0	0	987940	0	221586	483147
ATRA HCC1419 SD	530504	1.28938e+08	741978	3.8261e+08	946611	4.84921e+06	2.05029e+06	8.10425e+06	2.48488e+06	483628	1.76012e+07	1.40669e+07	3.46099e+06	8.5935e+06	7.77502e+06	253479	389271	0	0	332488	167946	246833	0	0	135847	696802	30322.7	0	0	79343.9	180729	0	68114.7	0	73696.9	197584	0	245742	104100	50882.7	87648.1	251375	0	0	0	868875	0	28806.9	66528.2
t-test ATRA vs DMSO HCC1419	0.886251	0.158883	0.025659	0.289644	0.0657499	0.314325	0.14014	0.145302	0.0572892	0.248553	0.751261	0.583335	0.948899	0.495905	0.77342	0.189431	0.523824	#DIV/0!	#DIV/0!	0.0336449	0.036765	0.899422	#DIV/0!	#DIV/0!	0.0137011	0.609234	0.453603	#DIV/0!	#DIV/0!	0.39401	0.798519	#DIV/0!	0.477672	#DIV/0!	0.91493	0.845923	#DIV/0!	0.995615	0.579226	0.42265	0.735076	0.460232	#DIV/0!	#DIV/0!	#DIV/0!	0.322693	#DIV/0!	0.235675	0.253509
HCC1599_48h_DMSO_basal_TN_16-1*	13167000	0	336460	0	95592.6	0	727018	9525240	4658740	1749560	31236400	10894500	12618400	62556700	36889700	24502700	197161000	45982100	82215900	331501000	118897000	87471200	39213400	30363100	221339000	43399400	59606200	14097800	5570610	31860400	11175300	23949200	33168000	28681700	11317500	5713020	33057100	8403650	87496200	17137200	29910900	0	2200040	17128300	5338380	31837800	0	0	0
HCC1599_48h_DMSO_basal_TN_16-2*	10090100	0	405169	16270000	205212	0	817034	12224900	5771420	1257920	45008700	15882400	13394400	76840300	54134400	23990100	222579000	57740600	95326800	416874000	146833000	115864000	45515200	40516600	291370000	62359800	84351400	20293600	8112970	35015200	13396200	28679200	40577900	38059400	13848800	4535050	47831500	19494700	182021000	30306200	59304700	371608	2532500	19968300	6574290	23285300	1494460	0	0
HCC1599_48h_DMSO_basal_TN_16-3*	13479100	0	414053	0	235328	0	1073990	14792400	7386950	2343280	48405800	22295900	11711000	96264400	9517760	24905300	264779000	73962800	107948000	480106000	188412000	109178000	56207000	43813500	334575000	70390200	95564400	24527400	10289400	42061800	18221300	36524700	52531900	47633400	17330300	7912640	50856400	12347700	125800000	24443300	54067900	554519	3000970	18072600	5853110	32090900	0	81183.5	0
DMSO HCC1599 Mean	12245400	0	385227	5.42333e+06	178711	0	872681	1.21808e+07	5.93904e+06	1.78359e+06	41550300	16357600	12574600	78553800	3.3514e+07	2.4466e+07	228173000	59228500	9.51636e+07	4.09494e+08	1.51381e+08	1.04171e+08	4.69785e+07	3.82311e+07	282428000	5.87165e+07	7.98407e+07	19639600	7.99099e+06	3.63125e+07	1.42643e+07	29717700	42092600	3.81248e+07	1.41655e+07	6053570	43915000	13415350	131772400	2.39622e+07	4.77612e+07	308709	2.57784e+06	1.83897e+07	5.92193e+06	2.90713e+07	498153	27061.2	0
DMSO HCC1599 SD	1.87306e+06	0	42466.7	9.39349e+06	73540.7	0	180055	2.63386e+06	1.37181e+06	543479	9.09217e+06	5.71554e+06	842554	1.69191e+07	2.24991e+07	458700	3.41543e+07	1.40496e+07	1.28668e+07	7.45769e+07	3.49799e+07	1.48438e+07	8.59079e+06	7.01043e+06	5.71451e+07	1.38593e+07	1.83986e+07	5.24547e+06	2.36176e+06	5.22296e+06	3.60232e+06	6.35174e+06	9.77041e+06	9.47602e+06	3.01889e+06	1.71435e+06	9.52407e+06	5.62208e+06	4.75446e+07	6.59767e+06	1.5679e+07	282560	402385	1.44632e+06	620822	5.01245e+06	862827	46871.3	0
HCC1599_48h_ATRA_basal_TN_16-4*	3929130	0	108183	0	0	0	361757	4035990	2434770	713899	7822850	2729190	1608200	17639500	8459210	20111700	89374700	35637900	47050400	181060000	75583100	70167900	25615900	26744000	137100000	30470500	42967500	12259200	5734060	17236100	5466630	14281500	15479800	13796300	5140320	864501	15774500	3916620	34570500	7808130	12072600	0	467276	7064550	2422480	13441400	0	0	0
HCC1599_48h_ATRA_basal_TN_16-5*	6427500	0	264639	0	219280	0	548074	8062390	3381150	1242630	16219600	5482790	2598000	29126700	17793200	33965400	179726000	62787500	83749500	359534000	143916000	127618000	46846700	57152300	294603000	56513200	84006900	24763200	11121800	37505000	10492800	29844800	28236300	31510300	11657900	1489330	35303300	9944140	92192200	15407800	39572500	78975.4	811598	16067700	4983340	27221600	0	0	0
HCC1599_48h_ATRA_basal_TN_16-6*	7387880	0	624318	0	239020	0	907004	10442000	5461270	2291350	21992700	6352200	5888700	41425300	22602600	34779700	257456000	85303400	131727000	485244000	227597000	158045000	76927900	66639800	419694000	78402900	129997000	36977600	14026200	47602800	13821900	43341000	38517300	45124100	14153300	2227010	43081800	8748480	95884700	19048000	35607300	109158	1601020	18320700	6727330	28746100	0	0	0
ATRA HCC1599 Mean	5.91484e+06	0	332380	0	152767	0	605612	7513460	3.75906e+06	1.41596e+06	15345050	4.85473e+06	3.36497e+06	2.93972e+07	1.6285e+07	2.96189e+07	175518900	6.12429e+07	8.7509e+07	341946000	1.49032e+08	118610300	4.97968e+07	50178700	283799000	5.51289e+07	8.56571e+07	2.46667e+07	10294020	3.41146e+07	9927110	2.91558e+07	2.74111e+07	3.01436e+07	1.03172e+07	1526947	3.13865e+07	7.53641e+06	74215800	1.4088e+07	2.90841e+07	62711.1	959965	13817650	4711050	2.31364e+07	0	0	0
ATRA HCC1599 SD	1.78546e+06	0	264652	0	132667	0	277140	3.23809e+06	1.54824e+06	802882	7.12529e+06	1.8914e+06	2.24095e+06	1.18952e+07	7.1913e+06	8.24357e+06	8.41196e+07	2.48688e+07	4.24633e+07	1.52853e+08	7.6136e+07	4.46257e+07	2.57829e+07	2.08421e+07	1.41606e+08	2.39962e+07	4.35382e+07	1.23595e+07	4.20759e+06	1.54646e+07	4.20626e+06	1.4542e+07	1.15409e+07	1.57086e+07	4.65367e+06	682033	1.40687e+07	3.19133e+06	3.43834e+07	5.73499e+06	1.48652e+07	56367.2	581252	5.95586e+06	2.1653e+06	8.43062e+06	0	0	0
t-test ATRA vs DMSO HCC1599	0.0133571	#DIV/0!	0.763853	0.42265	0.785656	#DIV/0!	0.245191	0.127781	0.14303	0.551823	0.019034	0.0613626	0.0111871	0.018255	0.315089	0.392119	0.398081	0.910138	0.789353	0.542469	0.964521	0.639446	0.871302	0.429998	0.988694	0.836131	0.846317	0.567587	0.466435	0.833671	0.248023	0.955293	0.169867	0.501486	0.305853	0.031194	0.279345	0.208541	0.171511	0.123427	0.208868	0.268487	0.0208206	0.313754	0.438005	0.366068	0.42265	0.42265	#DIV/0!
MB157_48h_DMSO_basal_TN_5-1	4026690	0	0	0	46295.2	0	448890	5504110	2181980	565605	35196300	4187080	4610250	49918200	6625400	4146570	3571550	2059340	0	4660340	1055520	1692020	0	0	1090900	4656840	268540	0	201494	948636	2111260	200247	2842550	399579	1634560	637099	1092440	3118660	9265930	1564230	3971020	0	0	1053250	0	12663400	942170	0	0
MB157_48h_DMSO_basal_TN_5-2	4996660	0	0	0	68533	0	408572	5615210	2579030	701868	39706200	6195740	5546210	42204700	11726300	4610490	3046030	2655020	365613	5988030	1092930	1776730	0	0	1710250	5323670	326877	0	183192	1236650	2452440	326801	3565410	718465	1883460	843938	1560260	2873940	9172810	1784890	4381150	0	93691.4	1101960	0	10104400	1130600	0	0
MB157_48h_DMSO_basal_TN_5-3	4846160	0	127669	0	0	217142	680301	8527340	3268240	1785100	55863400	7779590	8065500	79622700	15279000	6546430	5916640	4187370	990471	10300600	1921330	3624720	0	0	2880450	6894580	941890	0	116432	2200520	4662410	275474	6952450	1173120	2909310	660536	1517920	3211320	7601110	2120700	4078750	0	0	604039	0	13092800	775014	0	0
DMSO MB157 Mean	4623170	0	42556.3	0	38276.1	72380.7	512588	6.54889e+06	2.67642e+06	1.01752e+06	4.35886e+07	6.05414e+06	6.07399e+06	5.72485e+07	1.12102e+07	5.10116e+06	4.17807e+06	2.96724e+06	452028	6982990	1.35659e+06	2364490	0	0	1.89387e+06	5625030	512436	0	167039	1.46194e+06	3075370	267507	4453470	763721	2.14244e+06	713858	1.39021e+06	3.06797e+06	8679950	1.82327e+06	4143640	0	31230.5	919750	0	1.19535e+07	949261	0	0
DMSO MB157 SD	522019	0	73709.7	0	34963.2	125367	146636	1.71429e+06	549639	668222	1.08668e+07	1.80044e+06	1.78706e+06	1.97567e+07	4.34982e+06	1.27295e+06	1.5284e+06	1.09783e+06	500858	2.94883e+06	489434	1.09221e+06	0	0	908795	1.14891e+06	373060	0	44772.4	655644	1.38496e+06	63652	2.19415e+06	388751	675686	113261	258741	174308	935462	280214	212626	0	54092.8	274496	0	1.61572e+06	177899	0	0
MB157_48h_ATRA_basal_TN_5-4	5757560	0	126280	0	148270	120742	680744	9774080	3862530	1500800	50612200	11490800	7133030	66479900	22832000	5974760	11821600	2896500	1326440	17332100	2528740	4129970	163930	526729	5158300	6284730	1088220	0	0	1906950	3494070	673574	5375710	1392630	2076940	1143390	2074780	2516510	16935200	2547920	6332200	0	234644	974794	377054	10367400	695800	0	0
MB157_48h_ATRA_basal_TN_5-5	4226210	0	0	0	81396.8	0	654283	9165600	4206930	842886	44967800	11144100	7792250	70457700	15807900	6206570	11451400	3040850	1443070	16437500	2988480	4121390	157490	817108	5468670	5930540	1113910	0	117335	2920820	4240450	749490	6617580	1143730	2264570	0	2275760	2610780	18845900	2965400	6491790	0	184647	820003	0	11531000	866899	0	0
MB157_48h_ATRA_basal_TN_5-6	3988140	0	123261	18312300	0	0	457344	8865430	4125340	1376140	44502600	10556300	5351630	61877300	15378000	5888080	9572270	2589200	703282	13879000	2572710	4177970	253041	619764	4745760	5955200	1085140	0	280992	2633870	3828410	775446	6168580	1501500	2569810	1076810	2362900	3168190	19266900	2912120	7451900	0	218431	0	0	8273050	309617	0	0
ATRA MB157 Mean	4.6573e+06	0	83180.3	6104100	76555.6	40247.3	597457	9268370	4.06493e+06	1239942	46694200	1.10637e+07	6758970	6.62716e+07	1.8006e+07	6.02314e+06	1.09484e+07	2.84218e+06	1.1576e+06	1.58829e+07	2.69664e+06	4143110	191487	654534	5.12424e+06	6.05682e+06	1.09576e+06	0	132776	2.48721e+06	3854310	732837	6.05396e+06	1.34595e+06	2.30377e+06	740067	2.23781e+06	2765160	1.83493e+07	2808480	6758630	0	212574	598266	125685	10057150	624105	0	0
ATRA MB157 SD	960257	0	72052.1	1.05726e+07	74253.5	69710.4	122061	462961	179971	349464	3.40105e+06	472405	1.26258e+06	4.29399e+06	4.18499e+06	164664	1.20607e+06	230672	397747	1.79212e+06	253692	30492.9	53404.5	148279	362656	197758	15796.5	0	141131	522603	373863	52938.4	628820	183395	248763	641781	147761	352202	1.24263e+06	227219	605669	0	25507.9	523862	217692	1.65098e+06	285475	0	0
t-test ATRA vs DMSO MB157	0.960173	#DIV/0!	0.532342	0.42265	0.481215	0.722917	0.485328	0.10211	0.0378512	0.64447	0.676363	0.0334744	0.619479	0.514265	0.123061	0.336004	0.00452638	0.863427	0.13228	0.0170344	0.0244351	0.105957	0.0249606	0.0166802	0.0151779	0.583657	0.113317	#DIV/0!	0.721503	0.105	0.435253	0.000731039	0.333379	0.105302	0.72822	0.950473	0.0139627	0.276388	0.000617943	0.0100788	0.0105526	#DIV/0!	0.0153044	0.41546	0.42265	0.228152	0.183065	#DIV/0!	#DIV/0!
MDA-MB157_48h_DMSO_basal_TN_7-1	3378680	0	0	0	0	0	0	1012680	816417	576609	33837900	3728470	8863170	92547900	13106300	0	2192780	394261	0	5923780	247211	1192420	0	140966	1638990	527101	217516	0	0	0	595505	0	354666	308572	0	779604	864733	308434	637730	0	419511	0	563983	2916250	1793020	64879200	6009910	0	0
MDA-MB157_48h_DMSO_basal_TN_7-2	2148400	0	0	0	0	0	0	1070250	916690	221399	20393700	2825290	5279960	55532100	6209940	0	1720980	154969	0	4096260	278702	778130	0	0	1080870	463216	0	0	0	0	517659	0	209525	460496	0	374688	688454	304708	581291	0	390617	82049.8	301435	2752720	1715920	48983500	3270210	0	42775.1
MDA-MB157_48h_DMSO_basal_TN_7-3	2431600	0	0	0	0	0	0	1134090	892715	376920	16149000	2339540	2901760	45384900	8460990	255906	1062970	0	0	2315480	188842	303793	0	0	414021	0	0	0	0	0	256523	0	91248.2	0	0	383931	229349	206019	236770	0	293470	0	294879	2898790	1468240	49877800	3134340	0	0
DMSO MDAMB157 Mean	2.65289e+06	0	0	0	0	0	0	1072340	875274	391643	23460200	2.96443e+06	5681630	64488300	9.25908e+06	85302	1658910	183077	0	4111840	238252	758114	0	46988.7	1044627	330106	72505.3	0	0	0	456562	0	218480	256356	0	512741	594179	273054	485264	0	367866	27349.9	386766	2855920	1659060	5.45802e+07	4.13815e+06	0	14258.4
DMSO MDAMB157 SD	644302	0	0	0	0	0	0	60732	52362.3	178062	9.23455e+06	704842	3.00093e+06	2.48243e+07	3.51677e+06	147747	567457	198628	0	1.8042e+06	45595	444652	0	81386.8	613288	287659	125583	0	0	0	177558	0	131937	234647	0	231156	328015	58083.6	217044	0	66028.7	47371.5	153510	89799.2	169692	8.93043e+06	1.62241e+06	0	24696.2
MDA-MB157_48h_ATRA_basal_TN_7-4	4478450	0	0	0	0	0	0	1360260	1403030	542470	34188800	6660120	9592620	82513700	30182800	2488480	5407700	1985120	0	13209100	918333	2375440	0	227951	3370460	2516660	198362	0	0	92632.4	1808460	100694	646825	515327	155249	576782	844778	902524	710671	0	374795	199376	433304	1185390	774247	32251700	2971660	0	83654.4
MDA-MB157_48h_ATRA_basal_TN_7-5	6512930	0	43103.3	0	0	0	0	925675	1242140	399113	15438300	2109830	3999750	44154700	10273800	1756140	4568540	1822570	0	8440480	892763	1591200	0	368574	1547010	1140950	0	0	0	0	1226350	0	484426	509101	79125.1	445795	269373	732797	685281	0	196330	201575	389225	1584020	1103510	36190600	2108810	0	0
MDA-MB157_48h_ATRA_basal_TN_7-6	8948370	0	0	0	0	0	0	1117190	1521600	401445	21604700	3039710	5981240	57349500	9771110	1899850	6345610	1944730	0	10967200	905555	2012150	0	263580	2726030	1295380	0	0	0	0	887907	0	653673	397949	246959	505943	628992	787547	778792	0	490776	0	267002	2696110	2464870	58171500	4384970	71701.8	161988
ATRA MDAMB157 Mean	6.64658e+06	0	14367.8	0	0	0	0	1134375	1.38892e+06	447676	2.37439e+07	3.93655e+06	6.52454e+06	61339300	16742570	2.04816e+06	5.44062e+06	1.91747e+06	0	10872260	905550	1992930	0	286702	2.54783e+06	1.651e+06	66120.7	0	0	30877.5	1.30757e+06	33564.7	594975	474126	160444	509507	581048	807623	724915	0	353967	133650	363177	1821840	1.44754e+06	42204600	3.15515e+06	23900.6	81880.8
ATRA MDAMB157 SD	2.23796e+06	0	24885.7	0	0	0	0	217802	140263	82102.3	9.55654e+06	2.40407e+06	2.83574e+06	1.94883e+07	1.16423e+07	388042	888992	84633.4	0	2.38573e+06	12785	392473	0	73107.2	924693	753652	114524	0	0	53481.3	465620	58135.7	95799.2	66044.3	84037.5	65566.2	290683	86626.1	48355.3	0	148324	115750	86156.6	782935	896281	1.39673e+07	1.14912e+06	41397.1	81008.6
t-test ATRA vs DMSO MDAMB157	0.0808037	#DIV/0!	0.42265	#DIV/0!	#DIV/0!	#DIV/0!	#DIV/0!	0.675859	0.0148943	0.656676	0.972275	0.561778	0.741541	0.871633	0.383211	0.00661179	0.00577449	0.00135871	#DIV/0!	0.0198499	0.00076723	0.0232298	#DIV/0!	0.0195857	0.0887113	0.0788498	0.951269	#DIV/0!	#DIV/0!	0.42265	0.0722488	0.42265	0.0192978	0.245104	0.0805532	0.983253	0.961137	0.00161233	0.191361	#DIV/0!	0.892276	0.248702	0.830748	0.147704	0.724502	0.27685	0.444986	0.42265	0.282598
Hs578T_48h_DMSO_basal_TN_3-1	638175	0	0	0	0	0	0	428978	1020380	0	1887000	482731	152748	7250810	3255440	169556	402125	78147.9	206302	535871	128166	0	0	0	265399	212011	0	0	0	0	267586	0	106169	0	0	303561	0	294361	532148	0	184256	73705.2	0	511222	806434	1607770	0	0	120562
Hs578T_48h_DMSO_basal_TN_3-2	1113210	0	0	0	0	0	0	784314	762953	0	6317660	608952	842711	15554600	1896800	957670	2176480	798991	0	3597940	752303	481714	0	123958	1056490	1102800	465934	0	0	146707	1014630	193282	975806	448567	620534	409692	452646	831138	1389540	269268	609042	0	0	0	516081	641355	0	0	155670
Hs578T_48h_DMSO_basal_TN_3-3	274579	0	42189.6	0	0	0	0	652640	732545	0	0	426677	352167	6797240	2249590	136301	338741	0	0	532126	0	0	0	0	337264	301333	0	0	0	0	647586	0	307774	0	0	342812	0	475100	1013090	0	255089	76795.1	0	353899	324197	1141370	0	0	134906
DMSO Hs578T Mean	675321	0	14063.2	0	0	0	0	621977	838626	0	2.73489e+06	506120	449209	9867550	2.46728e+06	421176	972449	292380	68767.3	1.55531e+06	293490	160571	0	41319.3	553051	538715	155311	0	0	48902.3	643267	64427.3	463250	149522	206845	352022	150882	533533	978259	89756	349462	50166.8	0	288374	548904	1130165	0	0	137046
DMSO Hs578T SD	420548	0	24358.2	0	0	0	0	179641	158136	0	3.24305e+06	93361.3	355070	4.93035e+06	704994	464915	1.0432e+06	440475	119109	1.76897e+06	402478	278118	0	71567.2	437469	490549	269007	0	0	84701.3	373541	111591	455189	258980	358265	53661.5	261335	273118	429756	155462	227575	43473.2	0	261834	242788	483305	0	0	17651.6
Hs578T_48h_ATRA_basal_TN_3-4	408543	0	0	0	0	0	0	998342	836763	0	0	0	0	2597470	565829	229700	2867420	470724	722437	3721680	1363090	923278	0	277033	1784730	1315570	842753	166158	0	472113	755836	588704	1207260	730555	803478	262642	723613	790781	3926440	557963	1644700	0	114649	389077	1685030	1844610	78537.5	151375	270041
Hs578T_48h_ATRA_basal_TN_3-5	1618470	0	0	0	0	0	0	1263300	996412	90022.2	4325700	1028300	762851	12698900	4322800	2142250	15379500	3274370	2947760	22987500	7182220	4767840	1507640	1713640	10253100	5862190	3922030	724101	594815	2165910	3304590	2047900	5241330	3243430	2247790	1461390	2669000	3894940	12686400	1341380	4123470	0	78474.8	376401	1779240	1315380	0	135245	322609
Hs578T_48h_ATRA_basal_TN_3-6	479991	0	0	0	0	0	0	922399	795263	0	0	227733	283461	0	804171	219277	1989280	191343	320991	2599580	1173480	633506	114603	0	1464390	1292490	741267	0	167844	381472	674110	399242	1166770	539505	480587	538885	532802	884713	3282170	447300	1527850	194900	0	543237	1050380	1400610	82577.7	152252	220599
ATRA Hs578T Mean	835668	0	0	0	0	0	0	1061347	876146	30007.4	1441900	418678	348771	5098790	1897600	863742	6745400	1.31215e+06	1330396	9.76959e+06	3.2396e+06	2108208	540748	663558	4500740	2.82342e+06	1835350	296753	254220	1.0065e+06	1.57818e+06	1.01195e+06	2.53845e+06	1.5045e+06	1177285	754306	1.30847e+06	1.85681e+06	6631670	782214	2.43201e+06	64966.7	64374.6	436238	1.50488e+06	1520200	53705.1	146291	271083
ATRA Hs578T SD	678867	0	0	0	0	0	0	178971	106200	51974.3	2.49744e+06	540088	385596	6.7088e+06	2.10366e+06	1.10723e+06	7.49023e+06	1.70507e+06	1.41499e+06	1.14608e+07	3.41573e+06	2.30786e+06	839312	919887	4.98426e+06	2.63168e+06	1.80783e+06	379304	306670	1.0051e+06	1.49567e+06	902148	2.34085e+06	1.50899e+06	941037	627737	1.18211e+06	1.7657e+06	5.25344e+06	487403	1.46601e+06	112526	58610.7	92880.1	396420	284161	46553.8	9575.87	51013
t-test ATRA vs DMSO Hs578T	0.748799	#DIV/0!	0.42265	#DIV/0!	#DIV/0!	#DIV/0!	#DIV/0!	0.0398996	0.752466	0.42265	0.615173	0.80693	0.756748	0.381939	0.692874	0.573518	0.312881	0.410718	0.262013	0.339841	0.272947	0.280505	0.38055	0.361952	0.303381	0.269674	0.247166	0.308148	0.287555	0.240102	0.393161	0.20901	0.26228	0.25829	0.208721	0.382562	0.22842	0.323121	0.202647	0.122367	0.12984	0.847348	0.197461	0.436816	0.0321156	0.308907	0.18376	0.00142519	0.0338569
MDA-MB231_48h_DMSO_basal_TN_6-1	1374260	0	0	0	0	0	0	623785	579844	0	2588220	333729	0	6934050	2772660	731054	2393520	281498	393561	3649990	1150760	1069580	0	106087	1377020	1328760	0	0	0	360694	509016	98637.7	901787	139473	369678	662521	259239	673523	2155190	384229	416366	0	137357	2089990	1038810	8268790	971900	246889	525467
MDA-MB231_48h_DMSO_basal_TN_6-2	2422910	0	0	0	0	0	0	940490	620624	158110	4506560	507908	373102	10635900	3415370	1396540	4841150	1240030	946460	7094990	1547070	2026940	0	280440	2334670	2180870	479979	0	0	868996	629171	164493	1507730	492132	722388	767813	539559	1134400	3945770	613320	868483	0	162810	3286950	1991550	9083570	1234040	359993	707442
MDA-MB231_48h_DMSO_basal_TN_6-3	1434870	0	0	0	0	0	0	827824	759821	92257.2	3119480	217797	282156	6706160	1543530	663716	2367760	373474	350409	3579220	810619	660238	0	160907	1221100	1334090	0	0	0	166978	387832	0	663854	0	157232	579499	176187	361196	1545360	240690	314410	0	191547	3592190	1746870	10864600	1273490	220902	510374
DMSO MDAMB231 Mean	1.74401e+06	0	0	0	0	0	0	797366	653430	83455.7	3.40475e+06	353145	218419	8.09204e+06	2.57719e+06	930437	3200810	631667	563477	4.77473e+06	1169483	1.25225e+06	0	182478	1.64426e+06	1.61457e+06	159993	0	0	465556	508673	87710.2	1024457	210535	416433	669944	324995	723040	2.54877e+06	412746	533086	0	163905	2989710	1592410	9.40565e+06	1159810	275928	581094
DMSO MDAMB231 SD	588722	0	0	0	0	0	0	160534	94366.8	79421.6	990476	146027	194546	2.206e+06	951107	405059	1.42063e+06	528861	332374	2.00971e+06	368582	701424	0	89155.6	602971	490435	277116	0	0	362566	120670	82789.2	435106	253645	285464	94376.2	190401	388973	1.24767e+06	187945	294902	0	27111.6	793987	494795	1.32754e+06	163926	73952.9	109680
MDA-MB231_48h_ATRA_basal_TN_6-4	1025070	0	0	0	0	0	0	581785	694590	0	0	237372	0	5088660	1665690	575310	2786600	782736	375137	3063100	685158	972040	0	90219.9	847776	2081190	111498	0	0	295079	825342	0	653001	241244	207632	367211	195235	672080	1695630	95855	295066	0	418553	3055780	1654390	10765100	1476330	179124	347930
MDA-MB231_48h_ATRA_basal_TN_6-5	2127140	0	246319	0	0	0	0	495785	776952	157618	2487790	362434	232179	6284770	2448520	1481780	4122090	2429460	838640	6032880	1587860	1557240	0	0	2432990	3387410	745100	0	0	526089	1133610	168664	1293760	198802	908002	428659	405488	793414	2922760	270502	620109	0	199625	2212340	1101100	6629550	578404	172295	388184
MDA-MB231_48h_ATRA_basal_TN_6-6	1636270	0	0	0	0	0	0	548892	650333	0	0	426616	166553	5375770	1777740	1130050	2895140	1200330	547266	4672410	670817	1141580	0	0	1068020	2391770	231564	0	0	230709	536035	0	756865	260604	592636	462509	290373	912374	1842440	298932	520224	0	244507	3043000	1539700	13391200	1560860	195188	433042
ATRA MDAMB231 Mean	1596160	0	82106.3	0	0	0	0	542154	707292	52539.3	829263	342141	132911	5.58307e+06	1.96398e+06	1062380	3.26794e+06	1470842	587014	4.58946e+06	981278	1223620	0	30073.3	1.4496e+06	2.62012e+06	362721	0	0	350626	831662	56221.3	901209	233550	569423	419460	297032	792623	2153610	221763	478466	0	287562	2.77037e+06	1431730	10261950	1205198	182202	389719
ATRA MDAMB231 SD	552129	0	142212	0	0	0	0	43394.1	64258	91000.8	1.43633e+06	96240.3	119690	624419	423345	457008	741701	856042	234294	1.48663e+06	525364	301102	0	52088.5	858735	682394	336548	0	0	155327	298838	97378.2	343903	31611.2	350762	48310.4	105285	120149	670136	109962	166496	0	115640	483313	292020	3.40879e+06	544462	11752.8	42576.7
t-test ATRA vs DMSO MDAMB231	0.766958	#DIV/0!	0.42265	#DIV/0!	#DIV/0!	#DIV/0!	#DIV/0!	0.101692	0.46543	0.68084	0.070599	0.919236	0.558749	0.180746	0.388516	0.727488	0.946705	0.235601	0.925482	0.904555	0.641131	0.952684	#DIV/0!	0.0777289	0.765795	0.113986	0.467274	#DIV/0!	#DIV/0!	0.651924	0.193509	0.692089	0.720885	0.890004	0.590606	0.0267101	0.837629	0.791096	0.661321	0.219804	0.797282	#DIV/0!	0.200506	0.707826	0.658958	0.716243	0.900956	0.156307	0.0792775
CAL85-1_48h_DMSO_basal_TN_10-1	903837	0	0	0	0	0	0	891844	1227110	252284	3856620	370790	425862	8314980	1300180	936228	2574980	429878	494665	2002720	628331	660943	0	0	569695	1403980	0	0	0	0	324705	0	0	0	0	0	0	172478	279886	0	0	0	0	356193	0	143127	0	0	0
CAL85-1_48h_DMSO_basal_TN_10-2	1555010	0	44820.9	0	0	0	0	934251	1611070	368184	5163240	1267480	469604	16135300	5539910	1895990	6143300	968009	525167	4448400	965200	870941	0	124297	935061	1183790	356940	0	0	213150	598938	0	352964	0	104177	198232	0	56223.1	659395	0	0	0	0	0	0	0	0	0	0
CAL85-1_48h_DMSO_basal_TN_10-3	1226870	0	141208	0	0	0	0	602497	1338730	141247	3899380	747489	598425	9469990	2526230	735287	1786120	480063	0	1935430	319837	148866	0	0	245067	727419	0	0	0	0	356189	0	192791	0	141075	345178	0	182385	276486	0	139025	0	0	0	0	226068	0	0	0
DMSO CAL851 Mean	1.22857e+06	0	62009.6	0	0	0	0	809531	1.3923e+06	253905	4.30641e+06	795253	497964	1.13068e+07	3.12211e+06	1.18917e+06	3.50147e+06	625983	339944	2.79552e+06	637789	560250	0	41432.3	583274	1105063	118980	0	0	71050	426611	0	181918	0	81750.7	181137	0	137029	405256	0	46341.7	0	0	118731	0	123065	0	0	0
DMSO CAL851 SD	325590	0	72156.2	0	0	0	0	180546	197507	113477	742342	450249	89709	4.22133e+06	2.18177e+06	620316	2.32165e+06	297264	294795	1.43183e+06	322785	371419	0	71762.9	345197	345083	206079	0	0	123062	150068	0	176733	0	73162.5	173223	0	70154.8	220098	0	80266.1	0	0	205648	0	114361	0	0	0
CAL85-1_48h_ATRA_basal_TN_10-4	3929780	0	0	0	0	0	0	2672550	3314280	526203	9180990	3222610	1923780	19371800	6390990	1943050	6069440	717121	616266	5252630	1415780	1033280	0	193531	1349110	1604060	432657	0	0	0	818925	0	706733	0	0	310869	0	380715	1391260	0	0	0	0	0	0	177463	0	0	0
CAL85-1_48h_ATRA_basal_TN_10-5	4510640	0	0	0	0	0	0	2379830	2290760	430769	10662200	3473230	2036040	22190800	9292530	2431250	7119420	1256580	553207	6743540	1537000	1507290	104421	262862	1769180	2356410	583955	0	0	206798	896732	92243.7	739769	0	84609.6	363906	0	393133	1464040	147774	345948	0	82169.2	0	0	289719	0	0	0
CAL85-1_48h_ATRA_basal_TN_10-6	2348120	0	0	0	0	0	0	1959600	2158600	231980	7727930	2432260	910163	15904200	5093290	1468150	3276410	185738	0	3637200	874301	1176960	0	0	814487	1286780	158402	0	0	80611.1	593405	0	590765	0	0	273162	0	224825	1110570	84253.4	129535	102543	0	305208	0	176309	0	0	0
ATRA CAL851 Mean	3596180	0	0	0	0	0	0	2.33733e+06	2587880	396317	9.19037e+06	3042700	1.62333e+06	19155600	6.9256e+06	1.94748e+06	5.48842e+06	719813	389824	5.21112e+06	1.27569e+06	1.23918e+06	34807	152131	1.31093e+06	1.74908e+06	391671	0	0	95803	769687	30747.9	679089	0	28203.2	315979	0	332891	1.32196e+06	77342.5	158494	34181	27389.7	101736	0	214497	0	0	0
ATRA CAL851 SD	1.11919e+06	0	0	0	0	0	0	358370	632542	150107	1.46716e+06	543305	620164	3.14887e+06	2.15006e+06	481565	1.98629e+06	535426	339067	1.55359e+06	352861	243053	60287.5	136234	478491	549364	215717	0	0	104233	157544	53256.9	78254	0	48849.4	45587.3	0	93793.6	186648	74129	174783	59203.2	47440.4	176212	0	65146.7	0	0	0
t-test ATRA vs DMSO CAL851	0.057367	#DIV/0!	0.275036	#DIV/0!	#DIV/0!	#DIV/0!	#DIV/0!	0.00744614	0.0708595	0.264911	0.0146954	0.00581644	0.0851403	0.0661656	0.0979219	0.174106	0.324405	0.807266	0.857056	0.119227	0.0825191	0.0665678	0.42265	0.300653	0.106357	0.173997	0.188696	#DIV/0!	#DIV/0!	0.803836	0.0525188	0.42265	0.0251271	#DIV/0!	0.359245	0.308517	#DIV/0!	0.0485769	0.00574434	0.212481	0.391466	0.42265	0.42265	0.918796	#DIV/0!	0.310885	#DIV/0!	#DIV/0!	#DIV/0!
HCC1187_48h_DMSO_basal_TN_13bis-1	5546510	0	159098	85802000	85390	1154160	2081110	38532500	5745370	1320220	148962000	42706600	21452400	143045000	41767900	8949730	15244600	5373040	1092860	18860100	3791830	5619160	708443	1294810	6214640	12546800	1717340	256093	827820	6328130	10979900	941229	19818900	2290100	6084160	2759650	2609970	4289750	32830800	6273890	5639740	354335	0	0	0	7448760	0	0	0
HCC1187_48h_DMSO_basal_TN_13bis-2	3739030	0	158296	72428800	0	998863	1655670	33204900	5478240	1317800	141695000	40398600	14969400	143367000	32829300	10485900	15351900	4861050	1970420	19323200	4048050	5258890	626125	1030080	5360390	11763600	1998270	126197	675666	6784350	7265270	1283940	18127400	1878110	5287800	1895780	2128260	2724470	18870600	4487410	1961490	304232	0	0	0	7581790	0	0	0
HCC1187_48h_DMSO_basal_TN_13bis-3	3215800	0	170047	62219600	0	675074	1251990	28713000	5416070	2240900	126306000	34778700	18104400	147843000	39452500	7387140	16524400	5423080	2931710	23451900	4791520	6750920	973950	1266110	7929630	13330200	2851680	624542	1098070	7729990	10561800	1801240	20818000	2644530	7773370	3266870	3389130	5563040	39566500	6744660	7011060	522946	298564	0	0	11231200	441758	0	0
DMSO HCC1187	4.16711e+06	0	162480	7.34835e+07	28463.3	942699	1.66292e+06	3.34835e+07	5546560	1.62631e+06	1.38988e+08	3.92946e+07	18175400	1.44752e+08	3.80166e+07	8.94092e+06	1.5707e+07	5.21906e+06	1998330	2.05451e+07	4.21047e+06	5.87632e+06	769506	1197000	6.50155e+06	1.25469e+07	2.1891e+06	335611	867185	6947490	9.60232e+06	1.34214e+06	19588100	2.27091e+06	6.38178e+06	2.64077e+06	2709120	4192420	3.04226e+07	5835320	4.87076e+06	393838	99521.3	0	0	8.75392e+06	147253	0	0
DMSO HCC1187 SD	1.2229e+06	0	6565.18	1.18265e+07	49299.9	244431	414608	4.91567e+06	174958	532255	1.15681e+07	4.07762e+06	3.24208e+06	2.68201e+06	4.63908e+06	1.5494e+06	709948	311051	919743	2.52802e+06	519259	778549	181775	145267	1.30843e+06	783300	590756	258513	213936	715027	2.03472e+06	432949	1.36007e+06	383570	1.26923e+06	693233	636256	1.42179e+06	1.0556e+07	1.19082e+06	2.61114e+06	114583	172376	0	0	2.14642e+06	255049	0	0
HCC1187_48h_ATRA_basal_TN_13bis-4	4521360	0	113944	90199100	55599.4	1011910	2521600	45286500	6928930	1906660	154245000	39557900	15284400	145930000	46254800	13342800	23436300	10758200	3565710	35565800	9533260	10200700	1867860	2251710	11838600	14233800	3377590	1083430	1044380	10696400	12368600	1446240	28752400	3009310	6604120	1787140	5317200	3137730	39719400	7761020	7888610	184844	0	0	0	5073580	0	0	0
HCC1187_48h_ATRA_basal_TN_13bis-5	3295800	0	74283.6	42594000	45930.9	486045	1158910	24422800	4246930	925890	90448600	21954100	11926100	89495700	26993300	9326200	14633200	5508580	2464110	26921200	5549780	7458370	949441	1599730	7775380	10622900	2620070	618587	1072580	6729850	7362770	1180470	16976300	1703360	4420790	1003590	3276630	3522810	29787300	6078310	4808530	322178	0	0	0	5725950	0	0	0
HCC1187_48h_ATRA_basal_TN_13bis-6	2702030	0	0	29593800	0	150834	559014	14327700	3032690	916987	65676500	20372600	8820390	71518900	21821600	9246400	12600600	4217730	2106000	21311800	3700400	5327500	436102	1053480	6088110	8526780	1419680	228364	581926	5475380	5998980	599184	14654000	1248640	4011480	1077070	2640490	3274080	27413400	4561190	4600090	134143	0	0	0	6648240	0	0	0
ATRA HCC1187 Mean	3.5064e+06	0	62742.5	5.4129e+07	33843.4	549596	1.41317e+06	2.80123e+07	4.73618e+06	1.24985e+06	103456700	2.72949e+07	1.20103e+07	1.02315e+08	31689900	1.06385e+07	1.689e+07	6828170	2711940	2.79329e+07	6.26115e+06	7662190	1.08447e+06	1.63497e+06	8.56736e+06	1.11278e+07	2.47245e+06	643460	899629	7.63388e+06	8.57678e+06	1075298	2.01276e+07	1.9871e+06	5012130	1.28927e+06	3.74477e+06	3311540	32306700	6.13351e+06	5.76574e+06	213722	0	0	0	5.81592e+06	0	0	0
ATRA HCC1187 SD	927768	0	57842.1	3.19068e+07	29705.3	434042	1.0057e+06	1.57885e+07	1.99366e+06	568835	4.56947e+07	1.06495e+07	3.23283e+06	3.88266e+07	1.28759e+07	2.34236e+06	5.75961e+06	3.46416e+06	760758	7.18066e+06	2.98079e+06	2.44299e+06	725367	599892	2.95592e+06	2.88682e+06	987268	428075	275500	2.72538e+06	3.35386e+06	433211	7.55904e+06	913987	1.39381e+06	432733	1.39841e+06	195254	6.52839e+06	1.60063e+06	1.84141e+06	97286.8	0	0	0	791176	0	0	0
t-test ATRA vs DMSO HCC1187	0.500185	#DIV/0!	0.094364	0.408891	0.880843	0.260991	0.720599	0.616083	0.55475	0.449871	0.308935	0.180895	0.080052	0.198344	0.492086	0.362524	0.756872	0.505863	0.360822	0.209748	0.355368	0.332989	0.534105	0.332745	0.355543	0.487904	0.696239	0.358273	0.880277	0.709665	0.678846	0.492473	0.913688	0.65768	0.27723	0.0563679	0.332894	0.395638	0.808033	0.8095	0.655626	0.108399	0.42265	#DIV/0!	#DIV/0!	0.128859	0.42265	#DIV/0!	#DIV/0!
MDA-MB436_48h_DMSO_basal_TN_9-1	1072530	0	0	0	0	0	73108.9	4021260	1529580	974501	17568800	3352700	2316920	36970000	7110890	6524890	6136460	4138750	1463400	15126500	3372940	7153880	493547	1135390	6950120	3885670	1753750	418429	491696	3053440	1292160	723980	2779360	770905	529361	1397780	1056660	822432	3715610	377923	737128	0	0	1820150	437510	1161490	0	139866	323306
MDA-MB436_48h_DMSO_basal_TN_9-2	1338450	0	0	0	0	0	0	3826650	1490470	960004	16964100	2206970	2770490	37517000	9503820	6368680	7018750	3333840	1330120	14598000	3845900	4753540	670822	1464480	6770270	4415110	1592400	165536	346433	2310790	1288860	391143	2764160	495443	429876	879536	594413	499442	2966630	269254	328466	0	0	1408430	502685	1984600	0	161560	298942
MDA-MB436_48h_DMSO_basal_TN_9-3	1057310	0	0	0	0	0	0	3747460	1659560	812260	16723900	2692640	2233820	36509000	8547880	6627110	5970070	3275790	789885	12766100	2716450	5247280	401038	1394380	6090040	4392270	1555630	0	287891	2179600	1308690	436967	2556390	433688	496706	1152900	620512	552862	3448810	223069	559004	0	0	2317880	564714	1739930	0	189215	350040
DMSO MDAMB436 Mean	1.1561e+06	0	0	0	0	0	24369.6	3.86512e+06	1559870	915588	17085600	2750770	2440410	3.69987e+07	8387530	6.50689e+06	6.37509e+06	3.58279e+06	1.19447e+06	1.41635e+07	3.31176e+06	5.71823e+06	521802	1.33142e+06	6.60348e+06	4.23102e+06	1.63393e+06	194655	375340	2514610	1296570	517363	2699970	566679	485314	1.14341e+06	757195	624912	3.37702e+06	290082	541533	0	0	1848820	501636	1.62867e+06	0	163547	324096
DMSO MDAMB436 SD	158106	0	0	0	0	0	42209.4	140896	88521	89778.1	435357	575073	288862	504611	1.2045e+06	130152	563597	482347	356660	1.23873e+06	567205	1.26758e+06	137093	173345	453651	299297	105386	210729	104933	471228	10625.1	180396	124576	179540	50711.4	259252	259672	173130	379616	79500.3	204890	0	0	455402	63608.5	422683	0	24734.4	25558.2
MDA-MB436_48h_ATRA_basal_TN_9-4	1434830	0	0	0	0	0	77889.2	4548400	2042930	1370320	26370600	3826510	4291360	53358700	15988500	13952500	17280700	12442100	4091270	37077800	10610700	18030700	2450040	4868510	21948000	13637900	6552750	1015250	2014740	7119180	3101210	2540880	6303060	2802360	1719620	2192080	2943960	1054610	6576990	1040960	1600880	0	161279	1337740	0	1937700	0	180997	435744
MDA-MB436_48h_ATRA_basal_TN_9-5	1369620	0	0	0	0	0	15952	3497810	2104700	1270030	20807400	3002740	3732310	46670200	10106900	12394400	14618700	11524100	3685570	36390500	8385090	14141500	2137940	3582260	17116400	9917940	4674750	1154350	1669410	5235160	2482040	1498440	4360280	1883770	1659950	1085110	2391560	1095270	5444780	824416	1228840	0	0	1138280	475350	453597	0	156587	340578
MDA-MB436_48h_ATRA_basal_TN_9-6	988372	0	0	2633670	0	0	128416	4281780	1972180	943190	22188700	4159700	4197120	53196400	13430600	12993000	14095800	13409600	4443690	36066100	9771130	14739200	1718120	4435120	20200100	12783100	5686580	849045	2157960	5517060	2854020	1679390	4961280	1974770	1622000	1064950	2699400	1527680	6556080	1104360	1381380	0	0	641480	0	907110	0	152623	356325
ATRA MDAMB436	1264274	0	0	877890	0	0	74085.7	4109330	2.03994e+06	1.19451e+06	2.31222e+07	3.66298e+06	4.0736e+06	51075100	1.31753e+07	13113300	1.53317e+07	12458600	4073510	3.65115e+07	9.58897e+06	1.56371e+07	2.10203e+06	4.2953e+06	1.97548e+07	12112980	5.63803e+06	1006215	1947370	5.95713e+06	2.81242e+06	1.90624e+06	5.20821e+06	2220300	1667190	1447380	2.67831e+06	1.22585e+06	6.19262e+06	989912	1403700	0	53759.7	1.03917e+06	158450	1099469	0	163402	377549
ATRA MDAMB436 SD	241152	0	0	1.52055e+06	0	0	56328.4	546113	66310.7	223354	2.89671e+06	595563	299295	3.81562e+06	2.9491e+06	785985	1.70798e+06	942858	379372	516584	1.12393e+06	2.09432e+06	367279	654425	2.44638e+06	1.94842e+06	939941	152853	251146	1.01618e+06	311674	557014	994650	506128	49211.1	645008	276803	262179	647730	146788	187022	0	93114.5	358556	274443	760521	0	15365.8	51009.7
t-test ATRA vs DMSO MDAMB436	0.556522	#DIV/0!	#DIV/0!	0.42265	#DIV/0!	#DIV/0!	0.293204	0.523412	0.00225532	0.151155	0.0658673	0.129061	0.00245349	0.0220587	0.0910664	0.00386449	0.00702574	0.00073491	0.000676604	0.000205511	0.00345226	0.00435697	0.0100669	0.0115958	0.0094614	0.0178849	0.0168993	0.00737696	0.00339543	0.0151038	0.0137205	0.0391224	0.0466692	0.0202605	8.52209e-06	0.510877	0.000950486	0.0366226	0.00589296	0.00492845	0.00589352	#DIV/0!	0.42265	0.0763233	0.156868	0.36661	#DIV/0!	0.993622	0.204801
* data obtained on 4x106 cells/2.5 ml
[truncated: 481 more columns]

## Sheet: high-throughput lipid ID
m/z	RT(min)	[adduct]	main class	class	subclass	common name	exact mass	delta ppm
283.265	7.63	[M-H]-	Fatty Acyls	Fatty Acids and Conjugates	Straight chain fatty acids	Stearic acid	284.272	2.8
255.234	9.8	[M-H]-	Fatty Acyls	Fatty Acids and Conjugates	Straight chain fatty acids	Palmitic acid	256.24	3.2
281.25	10.35	[M-H]-	Fatty Acyls	Fatty Acids and Conjugates	Unsaturated fatty acids	Oleic acid	282.256	3.5
372.312	5.42	[M+H]+	Fatty Acyls	Fatty esters	Fatty acyl carnitines	Tetradecanoylcarnitine	371.304	2
424.343	6.73	[M+H]+	Fatty Acyls	Fatty esters	Fatty acyl carnitines	O-linoleoylcarnitine	423.335	1.4
454.39	8.91	[M+H]+	Fatty Acyls	Fatty esters	Fatty acyl carnitines	Car(20:1)	453.382	2.2
454.39	9.27	[M+H]+	Fatty Acyls	Fatty esters	Fatty acyl carnitines	Car(20:1)	453.382	2.1
494.325	5.03	[M+H]+	Glycerophospholipids	Glycerophosphocholines	Monoacylglycerophosphocholines	PC(16:1_0:0)	493.317	1.6
518.324	5.07	[M+H]+	Glycerophospholipids	Glycerophosphocholines	Monoacylglycerophosphocholines	PC(18:3_0:0)	517.317	0.1
528.288	5.21	[M+Cl]-	Glycerophospholipids	Glycerophosphocholines	Monoacylglycerophosphocholines	PC(16:1_0:0)	493.317	3.1
538.317	5.24	[M+HCOO]-	Glycerophospholipids	Glycerophosphocholines	Monoacylglycerophosphocholines	PC(16:1_0:0)	493.317	3.3
508.341	5.51	[M+H]+	Glycerophospholipids	Glycerophosphocholines	Monoacylglycerophosphocholines	PC(17:1_0:0)	507.332	2.6
496.341	5.64	[M+H]+	Glycerophospholipids	Glycerophosphocholines	Monoacylglycerophosphocholines	PC(16:0_0:0)	495.332	2
564.332	5.68	[M+HCOO]-	Glycerophospholipids	Glycerophosphocholines	Monoacylglycerophosphocholines	PC(18:2_0:0)	519.332	3.2
568.341	5.73	[M+H]+	Glycerophospholipids	Glycerophosphocholines	Monoacylglycerophosphocholines	PC(22:6_0:0)	567.332	1.7
508.341	5.76	[M+H]+	Glycerophospholipids	Glycerophosphocholines	Monoacylglycerophosphocholines	PC(17:1_0:0)	507.332	2.3
588.333	5.79	[M+HCOO]-	Glycerophospholipids	Glycerophosphocholines	Monoacylglycerophosphocholines	PC(20:4_0:0)	543.332	3.4
612.333	5.89	[M+HCOO]-	Glycerophospholipids	Glycerophosphocholines	Monoacylglycerophosphocholines	PC(22:6_0:0)	567.332	3.4
518.323	5.9	[M+Na]+	Glycerophospholipids	Glycerophosphocholines	Monoacylglycerophosphocholines	PC(16:0_0:0)	495.332	1.7
564.333	5.91	[M+HCOO]-	Glycerophospholipids	Glycerophosphocholines	Monoacylglycerophosphocholines	PC(18:2_0:0)	519.332	3.3
568.341	5.95	[M+H]+	Glycerophospholipids	Glycerophosphocholines	Monoacylglycerophosphocholines	PC(22:6_0:0)	567.332	1.5
510.356	5.98	[M+H]+	Glycerophospholipids	Glycerophosphocholines	Monoacylglycerophosphocholines	PC(17:0_0:0)	509.348	0.7
540.332	6.06	[M+HCOO]-	Glycerophospholipids	Glycerophosphocholines	Monoacylglycerophosphocholines	PC(16:0_0:0)	495.332	3.1
530.303	6.07	[M+Cl]-	Glycerophospholipids	Glycerophosphocholines	Monoacylglycerophosphocholines	PC(16:0_0:0)	495.332	3
570.356	6.08	[M+H]+	Glycerophospholipids	Glycerophosphocholines	Monoacylglycerophosphocholines	PC(22:5_0:0)	569.348	0.8
534.356	6.12	[M+H]+	Glycerophospholipids	Glycerophosphocholines	Monoacylglycerophosphocholines	PC(19:2_0:0)	533.348	1.3
522.356	6.14	[M+H]+	Glycerophospholipids	Glycerophosphocholines	Monoacylglycerophosphocholines	PC(18:1_0:0)	521.348	2
546.356	6.32	[M+H]+	Glycerophospholipids	Glycerophosphocholines	Monoacylglycerophosphocholines	PC(20:3_0:0)	545.348	0.1
566.348	6.35	[M+HCOO]-	Glycerophospholipids	Glycerophosphocholines	Monoacylglycerophosphocholines	PC(18:1_0:0)	521.348	3.2
556.319	6.35	[M+Cl]-	Glycerophospholipids	Glycerophosphocholines	Monoacylglycerophosphocholines	PC(18:1_0:0)	521.348	3.1
534.356	6.39	[M+H]+	Glycerophospholipids	Glycerophosphocholines	Monoacylglycerophosphocholines	PC(19:2_0:0)	533.348	1.2
546.356	6.59	[M+H]+	Glycerophospholipids	Glycerophosphocholines	Monoacylglycerophosphocholines	PC(20:3_0:0)	545.348	1.7
548.372	6.65	[M+H]+	Glycerophospholipids	Glycerophosphocholines	Monoacylglycerophosphocholines	PC(20:2_0:0)	547.364	2.6
572.372	6.7	[M+H]+	Glycerophospholipids	Glycerophosphocholines	Monoacylglycerophosphocholines	PC(22:4_0:0)	571.364	1.7
524.371	6.76	[M+H]+	Glycerophospholipids	Glycerophosphocholines	Monoacylglycerophosphocholines	PC(18:0_0:0)	523.364	0.6
548.372	6.87	[M+H]+	Glycerophospholipids	Glycerophosphocholines	Monoacylglycerophosphocholines	PC(20:2_0:0)	547.364	2.5
572.372	6.95	[M+H]+	Glycerophospholipids	Glycerophosphocholines	Monoacylglycerophosphocholines	PC(22:4_0:0)	571.364	2.2
524.372	7.03	[M+H]+	Glycerophospholipids	Glycerophosphocholines	Monoacylglycerophosphocholines	PC(18:0_0:0)	523.364	2.6
524.372	7.33	[M+H]+	Glycerophospholipids	Glycerophosphocholines	Monoacylglycerophosphocholines	PC(18:0_0:0)	523.364	2.6
550.388	7.39	[M+H]+	Glycerophospholipids	Glycerophosphocholines	Monoacylglycerophosphocholines	PC(20:1_0:0)	549.379	2.3
568.364	7.46	[M+HCOO]-	Glycerophospholipids	Glycerophosphocholines	Monoacylglycerophosphocholines	PC(18:0_0:0)	523.364	3.5
558.335	7.47	[M+Cl]-	Glycerophospholipids	Glycerophosphocholines	Monoacylglycerophosphocholines	PC(18:0_0:0)	523.364	3.3
574.388	7.51	[M+H]+	Glycerophospholipids	Glycerophosphocholines	Monoacylglycerophosphocholines	PC(22:3_0:0)	573.379	2
550.388	7.68	[M+H]+	Glycerophospholipids	Glycerophosphocholines	Monoacylglycerophosphocholines	PC(20:1_0:0)	549.379	2.5
574.388	7.78	[M+H]+	Glycerophospholipids	Glycerophosphocholines	Monoacylglycerophosphocholines	PC(22:3_0:0)	573.379	2.8
576.403	8.1	[M+H]+	Glycerophospholipids	Glycerophosphocholines	Monoacylglycerophosphocholines	PC(22:2_0:0)	575.395	1.2
576.403	8.39	[M+H]+	Glycerophospholipids	Glycerophosphocholines	Monoacylglycerophosphocholines	PC(22:2_0:0)	575.395	1.8
552.404	8.93	[M+H]+	Glycerophospholipids	Glycerophosphocholines	Monoacylglycerophosphocholines	PC(20:0_0:0)	551.395	2.5
578.42	9.14	[M+H]+	Glycerophospholipids	Glycerophosphocholines	Monoacylglycerophosphocholines	PC(22:1_0:0)	577.411	2.8
606.451	10.69	[M+H]+	Glycerophospholipids	Glycerophosphocholines	Monoacylglycerophosphocholines	PC(24:1_0:0)	605.442	2.5
632.466	11.06	[M+H]+	Glycerophospholipids	Glycerophosphocholines	Monoacylglycerophosphocholines	PC(26:2_0:0)	631.458	1.5
634.482	11.32	[M+H]+	Glycerophospholipids	Glycerophosphocholines	Monoacylglycerophosphocholines	PC(26:1_0:0)	633.473	2.3
622.482	11.34	[M+H]+	Glycerophospholipids	Glycerophosphocholines	Monoacylglycerophosphocholines	PC(25:0_0:0)	621.473	1.9
634.481	12.33	[M+H]+	Glycerophospholipids	Glycerophosphocholines	Monoacylglycerophosphocholines	PC(26:1_0:0)	633.473	0.4
608.465	12.35	[M+H]+	Glycerophospholipids	Glycerophosphocholines	Monoacylglycerophosphocholines	PC(24:0_0:0)	607.458	0.2
662.512	12.59	[M+H]+	Glycerophospholipids	Glycerophosphocholines	Monoacylglycerophosphocholines	PC(28:1_0:0)	661.505	0.1
664.528	13.3	[M+H]+	Glycerophospholipids	Glycerophosphocholines	Monoacylglycerophosphocholines	PC(28:0_0:0)	663.52	0.7
690.544	13.91	[M+H]+	Glycerophospholipids	Glycerophosphocholines	Monoacylglycerophosphocholines	PC(30:1_0:0)	689.536	1
636.497	14.12	[M+H]+	Glycerophospholipids	Glycerophosphocholines	Monoacylglycerophosphocholines	PC(26:0_0:0)	635.489	0.8
690.544	14.13	[M+H]+	Glycerophospholipids	Glycerophosphocholines	Monoacylglycerophosphocholines	PC(30:1_0:0)	689.536	1
690.543	14.63	[M+H]+	Glycerophospholipids	Glycerophosphocholines	Monoacylglycerophosphocholines	PC(30:1_0:0)	689.536	0.4
692.558	14.84	[M+H]+	Glycerophospholipids	Glycerophosphocholines	Monoacylglycerophosphocholines	PC(30:0_0:0)	691.552	0.5
692.559	14.93	[M+H]+	Glycerophospholipids	Glycerophosphocholines	Monoacylglycerophosphocholines	PC(30:0_0:0)	691.552	0.7
468.346	5.72	[M+H]+	Glycerophospholipids	Glycerophosphocholines	Monoalkylglycerophosphocholines	PC(O-15:0_0:0)	467.338	2.2
482.361	6.37	[M+H]+	Glycerophospholipids	Glycerophosphocholines	Monoalkylglycerophosphocholines	PC(O-16:0_0:0)	481.353	2
480.346	6.47	[M+H]+	Glycerophospholipids	Glycerophosphocholines	Monoalkylglycerophosphocholines	PC(O-16:1_0:0)	479.338	2.2
526.353	6.54	[M+HCOO]-	Glycerophospholipids	Glycerophosphocholines	Monoalkylglycerophosphocholines	PC(O-16:0_0:0)	481.353	3
496.377	7.1	[M+H]+	Glycerophospholipids	Glycerophosphocholines	Monoalkylglycerophosphocholines	PC(O-17:0_0:0)	495.369	2.5
508.378	7.82	[M+H]+	Glycerophospholipids	Glycerophosphocholines	Monoalkylglycerophosphocholines	PC(O-18:1_0:0)	507.369	2.9
510.393	7.89	[M+H]+	Glycerophospholipids	Glycerophosphocholines	Monoalkylglycerophosphocholines	PC(O-18:0_0:0)	509.385	2.9
508.378	7.96	[M+H]+	Glycerophospholipids	Glycerophosphocholines	Monoalkylglycerophosphocholines	PC(O-18:1_0:0)	507.369	2.8
554.385	8.01	[M+HCOO]-	Glycerophospholipids	Glycerophosphocholines	Monoalkylglycerophosphocholines	PC(O-18:0_0:0)	509.385	3.6
536.409	9.47	[M+H]+	Glycerophospholipids	Glycerophosphocholines	Monoalkylglycerophosphocholines	PC(O-20:1_0:0)	535.4	3
566.456	11.25	[M+H]+	Glycerophospholipids	Glycerophosphocholines	Monoalkylglycerophosphocholines	PC(O-22:0_0:0)	565.447	2.7
506.362	6.87	[M+H]+	Glycerophospholipids	Glycerophosphocholines	1Z-alkenylglycerophosphocholines	PC(P-18:1_0:0)	505.353	2.9
506.362	7.33	[M+H]+	Glycerophospholipids	Glycerophosphocholines	1Z-alkenylglycerophosphocholines	PC(P-18:1_0:0)	505.353	2.6
839.565	13.78	[M+H]+	Glycerophospholipids	Glycerophosphoinositols	Diacylglycerophosphoinositols	PI(10:0_24:0)	838.557	0.3
904.591	13.8	[M+NH4]+	Glycerophospholipids	Glycerophosphoinositols	Diacylglycerophosphoinositols	PI(18:1_20:3)	886.557	0.2
904.591	14.06	[M+NH4]+	Glycerophospholipids	Glycerophosphoinositols	Diacylglycerophosphoinositols	PI(18:1_20:3)	886.557	0
865.581	14.38	[M+H]+	Glycerophospholipids	Glycerophosphoinositols	Diacylglycerophosphoinositols	PI(36:1)	864.573	0.8
891.595	14.85	[M+H]+	Glycerophospholipids	Glycerophosphoinositols	Diacylglycerophosphoinositols	PI(38:2)	890.588	1.2
538.351	6.48	[M+H]+	Glycerophospholipids	Glycerophosphocholines	Diacylglycerophosphocholines	PC(18:0)	537.343	0.8
550.351	6.6	[M+H]+	Glycerophospholipids	Glycerophosphocholines	Diacylglycerophosphocholines	PC(19:1)	549.343	2
580.399	6.81	[M+H]+	Glycerophospholipids	Glycerophosphocholines	Diacylglycerophosphocholines	PC(21:0)	579.39	2.3
594.414	7.07	[M+H]+	Glycerophospholipids	Glycerophosphocholines	Diacylglycerophosphocholines	PC(22:0)	593.406	2.4
620.429	7.73	[M+H]+	Glycerophospholipids	Glycerophosphocholines	Diacylglycerophosphocholines	PC(24:1)	619.421	1.4
622.446	7.87	[M+H]+	Glycerophospholipids	Glycerophosphocholines	Diacylglycerophosphocholines	PC(24:0)	621.437	2.5
580.398	8.37	[M+H]+	Glycerophospholipids	Glycerophosphocholines	Diacylglycerophosphocholines	PC(21:0)	579.39	1.1
606.414	8.75	[M+H]+	Glycerophospholipids	Glycerophosphocholines	Diacylglycerophosphocholines	PC(23:1)	605.406	1.7
622.446	9.84	[M+H]+	Glycerophospholipids	Glycerophosphocholines	Diacylglycerophosphocholines	PC(24:0)	621.437	2.5
646.445	9.93	[M+H]+	Glycerophospholipids	Glycerophosphocholines	Diacylglycerophosphocholines	PC(26:2)	645.437	1.6
734.571	10.17	[M+H]+	Glycerophospholipids	Glycerophosphocholines	Diacylglycerophosphocholines	PC(32:0)	733.562	2.2
734.571	10.36	[M+H]+	Glycerophospholipids	Glycerophosphocholines	Diacylglycerophosphocholines	PC(32:0)	733.562	1.8
648.461	10.44	[M+H]+	Glycerophospholipids	Glycerophosphocholines	Diacylglycerophosphocholines	PC(26:1)	647.453	2
648.461	10.69	[M+H]+	Glycerophospholipids	Glycerophosphocholines	Diacylglycerophosphocholines	PC(26:1)	647.453	2.1
660.462	10.77	[M+H]+	Glycerophospholipids	Glycerophosphocholines	Diacylglycerophosphocholines	PC(27:2)	659.453	2.5
636.461	10.84	[M+H]+	Glycerophospholipids	Glycerophosphocholines	Diacylglycerophosphocholines	PC(25:0)	635.453	2.5
754.54	11.06	[M+H]+	Glycerophospholipids	Glycerophosphocholines	Diacylglycerophosphocholines	PC(34:4)	753.531	2
672.459	11.1	[M+H]+	Glycerophospholipids	Glycerophosphocholines	Diacylglycerophosphocholines	PC(28:3)	671.453	1.3
650.477	11.12	[M+H]+	Glycerophospholipids	Glycerophosphocholines	Diacylglycerophosphocholines	PC(26:0)	649.468	2.6
662.477	11.32	[M+H]+	Glycerophospholipids	Glycerophosphocholines	Diacylglycerophosphocholines	PC(27:1)	661.468	2.2
650.477	11.42	[M+H]+	Glycerophospholipids	Glycerophosphocholines	Diacylglycerophosphocholines	PC(26:0)	649.468	2.1
730.468	11.47	[M+HCOO]-	Glycerophospholipids	Glycerophosphocholines	Diacylglycerophosphocholines	PC(13:2_16:1)	685.468	2.8
760.586	11.6	[M+H]+	Glycerophospholipids	Glycerophosphocholines	Diacylglycerophosphocholines	PC(34:1)	759.578	1.4
664.492	11.83	[M+H]+	Glycerophospholipids	Glycerophosphocholines	Diacylglycerophosphocholines	PC(10:0_17:0)	663.484	1.6
724.489	12.44	[M+H]+	Glycerophospholipids	Glycerophosphocholines	Diacylglycerophosphocholines	PC(32:5)	723.484	2.8
702.506	12.49	[M+H]+	Glycerophospholipids	Glycerophosphocholines	Diacylglycerophosphocholines	PC(30:2)	701.5	1.3
678.507	12.53	[M+H]+	Glycerophospholipids	Glycerophosphocholines	Diacylglycerophosphocholines	PC(10:0_18:0)	677.5	0
700.489	12.53	[M+H]+	Glycerophospholipids	Glycerophosphocholines	Diacylglycerophosphocholines	PC(30:3)	699.484	2.9
678.507	12.54	[M+H]+	Glycerophospholipids	Glycerophosphocholines	Diacylglycerophosphocholines	PC(10:0_18:0)	677.5	0.1
736.472	12.79	[M+Cl]-	Glycerophospholipids	Glycerophosphocholines	Diacylglycerophosphocholines	PC(14:1_16:1)	701.5	3.6
702.507	12.96	[M+H]+	Glycerophospholipids	Glycerophosphocholines	Diacylglycerophosphocholines	PC(30:2)	701.5	0.3
884.542	13.11	[M+HCOO]-	Glycerophospholipids	Glycerophosphocholines	Diacylglycerophosphocholines	PC(21:6_20:4)	839.546	3.3
704.523	13.21	[M+H]+	Glycerophospholipids	Glycerophosphocholines	Diacylglycerophosphocholines	PC(30:1)	703.515	0.6
714.505	13.26	[M+H]+	Glycerophospholipids	Glycerophosphocholines	Diacylglycerophosphocholines	PC(31:3)	713.5	1.9
716.522	13.43	[M+H]+	Glycerophospholipids	Glycerophosphocholines	Diacylglycerophosphocholines	PC(31:2)	715.515	0.4
750.529	13.53	[M+HCOO]-	Glycerophospholipids	Glycerophosphocholines	Diacylglycerophosphocholines	PC(14:0_16:0)	705.531	0.6
750.505	13.55	[M+H]+	Glycerophospholipids	Glycerophosphocholines	Diacylglycerophosphocholines	PC(34:6)	749.5	2
728.523	13.77	[M+H]+	Glycerophospholipids	Glycerophosphocholines	Diacylglycerophosphocholines	PC(32:3)	727.515	0.2
718.539	14.04	[M+H]+	Glycerophospholipids	Glycerophosphocholines	Diacylglycerophosphocholines	PC(31:1)	717.531	0.7
728.521	14.06	[M+H]+	Glycerophospholipids	Glycerophosphocholines	Diacylglycerophosphocholines	PC(32:3)	727.515	1.9
710.474	14.14	[M+H]+	Glycerophospholipids	Glycerophosphocholines	Diacylglycerophosphocholines	PC(31:5)	709.468	2.6
688.492	14.15	[M+H]+	Glycerophospholipids	Glycerophosphocholines	Diacylglycerophosphocholines	PC(29:2)	687.484	0.6
876.573	14.16	[M+HCOO]-	Glycerophospholipids	Glycerophosphocholines	Diacylglycerophosphocholines	PC(40:7)	831.578	3.8
742.538	14.23	[M+H]+	Glycerophospholipids	Glycerophosphocholines	Diacylglycerophosphocholines	PC(33:3)	741.531	0.1
754.539	14.27	[M+H]+	Glycerophospholipids	Glycerophosphocholines	Diacylglycerophosphocholines	PC(34:4)	753.531	0.9
736.491	14.46	[M+H]+	Glycerophospholipids	Glycerophosphocholines	Diacylglycerophosphocholines	PC(33:6)	735.484	0.4
778.562	14.77	[M+HCOO]-	Glycerophospholipids	Glycerophosphocholines	Diacylglycerophosphocholines	PC(14:0_18:0)	719.547	1.7
766.519	14.79	[M+Cl]-	Glycerophospholipids	Glycerophosphocholines	Diacylglycerophosphocholines	PC(16:0_16:1)	731.547	4
780.554	14.85	[M+H]+	Glycerophospholipids	Glycerophosphocholines	Diacylglycerophosphocholines	PC(36:5)	779.546	0.1
768.554	15.03	[M+H]+	Glycerophospholipids	Glycerophosphocholines	Diacylglycerophosphocholines	PC(35:4)	767.546	0.1
756.554	15.04	[M+H]+	Glycerophospholipids	Glycerophosphocholines	Diacylglycerophosphocholines	PC(34:3)	755.546	0.6
738.507	15.11	[M+H]+	Glycerophospholipids	Glycerophosphocholines	Diacylglycerophosphocholines	PC(33:5)	737.5	0.3
824.548	15.12	[M+HCOO]-	Glycerophospholipids	Glycerophosphocholines	Diacylglycerophosphocholines	PC(16:1_20:4)	779.547	3.3
762.507	15.22	[M+H]+	Glycerophospholipids	Glycerophosphocholines	Diacylglycerophosphocholines	PC(35:7)	761.5	0.4
714.508	15.3	[M+H]+	Glycerophospholipids	Glycerophosphocholines	Diacylglycerophosphocholines	PC(31:3)	713.5	1.5
770.57	15.41	[M+H]+	Glycerophospholipids	Glycerophosphocholines	Diacylglycerophosphocholines	PC(35:3)	769.562	0.4
780.552	15.44	[M+H]+	Glycerophospholipids	Glycerophosphocholines	Diacylglycerophosphocholines	PC(36:5)	757.562	0.8
756.553	15.52	[M+H]+	Glycerophospholipids	Glycerophosphocholines	Diacylglycerophosphocholines	PC(34:3)	755.546	1.3
740.521	15.55	[M+H]+	Glycerophospholipids	Glycerophosphocholines	Diacylglycerophosphocholines	PC(33:4)	739.515	2.1
738.505	15.56	[M+H]+	Glycerophospholipids	Glycerophosphocholines	Diacylglycerophosphocholines	PC(33:5)	737.5	2.1
768.534	15.57	[M+Cl]-	Glycerophospholipids	Glycerophosphocholines	Diacylglycerophosphocholines	PC(16:0_16:0)	733.562	3.9
806.569	15.57	[M+H]+	Glycerophospholipids	Glycerophosphocholines	Diacylglycerophosphocholines	PC(38:6)	805.562	0.1
716.523	15.58	[M+H]+	Glycerophospholipids	Glycerophosphocholines	Diacylglycerophosphocholines	PC(31:2)	715.515	1
850.563	15.6	[M+HCOO]-	Glycerophospholipids	Glycerophosphocholines	Diacylglycerophosphocholines	PC(16:1_22:5)	805.562	3.7
830.57	15.64	[M+H]+	Glycerophospholipids	Glycerophosphocholines	Diacylglycerophosphocholines	PC(40:8)	829.562	0.3
714.505	15.79	[M+H]+	Glycerophospholipids	Glycerophosphocholines	Diacylglycerophosphocholines	PC(31:3)	713.5	1.9
692.523	15.79	[M+H]+	Glycerophospholipids	Glycerophosphocholines	Diacylglycerophosphocholines	PC(39:0)	691.515	0.9
782.57	15.8	[M+H]+	Glycerophospholipids	Glycerophosphocholines	Diacylglycerophosphocholines	PC(36:4)	781.562	0.7
804.552	15.8	[M+H]+	Glycerophospholipids	Glycerophosphocholines	Diacylglycerophosphocholines	PC(38:7)	803.546	2.6
854.57	15.83	[M+H]+	Glycerophospholipids	Glycerophosphocholines	Diacylglycerophosphocholines	PC(42:10)	853.562	0.3
878.57	15.9	[M+H]+	Glycerophospholipids	Glycerophosphocholines	Diacylglycerophosphocholines	PC(44:12)	877.562	0.2
828.552	15.91	[M+H]+	Glycerophospholipids	Glycerophosphocholines	Diacylglycerophosphocholines	PC(40:9)	827.546	2.4
788.523	15.92	[M+H]+	Glycerophospholipids	Glycerophosphocholines	Diacylglycerophosphocholines	PC(37:8)	787.515	0.6
762.505	16.04	[M+H]+	Glycerophospholipids	Glycerophosphocholines	Diacylglycerophosphocholines	PC(35:7)	761.5	2.1
840.579	16.09	[M+HCOO]-	Glycerophospholipids	Glycerophosphocholines	Diacylglycerophosphocholines	PC(18:2_19:2)	795.578	3.7
794.567	16.1	[M+H]+	Glycerophospholipids	Glycerophosphocholines	Diacylglycerophosphocholines	PC(37:5)	771.578	0.4
764.522	16.17	[M+H]+	Glycerophospholipids	Glycerophosphocholines	Diacylglycerophosphocholines	PC(35:6)	763.515	1.1
782.567	16.19	[M+H]+	Glycerophospholipids	Glycerophosphocholines	Diacylglycerophosphocholines	PC(36:4)	759.578	0.4
856.585	16.21	[M+H]+	Glycerophospholipids	Glycerophosphocholines	Diacylglycerophosphocholines	PC(40:9)	855.578	0.6
830.568	16.25	[M+H]+	Glycerophospholipids	Glycerophosphocholines	Diacylglycerophosphocholines	PC(40:8)	829.562	2
752.522	16.26	[M+H]+	Glycerophospholipids	Glycerophosphocholines	Diacylglycerophosphocholines	PC(34:5)	751.515	1.2
852.579	16.29	[M+HCOO]-	Glycerophospholipids	Glycerophosphocholines	Diacylglycerophosphocholines	PC(18:1_20:4)	807.578	3.2
842.55	16.31	[M+Cl]-	Glycerophospholipids	Glycerophosphocholines	Diacylglycerophosphocholines	PC(18:1_20:4)	807.578	3.6
866.548	16.32	[M+Cl]-	Glycerophospholipids	Glycerophosphocholines	Diacylglycerophosphocholines	PC(22:6_18:1)	831.578	1.4
796.585	16.36	[M+H]+	Glycerophospholipids	Glycerophosphocholines	Diacylglycerophosphocholines	PC(36:4)	795.578	0.3
854.567	16.38	[M+H]+	Glycerophospholipids	Glycerophosphocholines	Diacylglycerophosphocholines	PC(42:10)	853.562	3
876.577	16.44	[M+HCOO]-	Glycerophospholipids	Glycerophosphocholines	Diacylglycerophosphocholines	PC(18:1_22:6)	831.578	1.7
718.539	16.45	[M+H]+	Glycerophospholipids	Glycerophosphocholines	Diacylglycerophosphocholines	PC(31:1)	717.531	0.6
766.538	16.53	[M+H]+	Glycerophospholipids	Glycerophosphocholines	Diacylglycerophosphocholines	PC(35:5)	765.531	0.4
828.579	16.57	[M+HCOO]-	Glycerophospholipids	Glycerophosphocholines	Diacylglycerophosphocholines	PC(16:0_20:3)	783.578	3.6
790.538	16.63	[M+H]+	Glycerophospholipids	Glycerophosphocholines	Diacylglycerophosphocholines	PC(37:7)	789.531	0.3
856.583	16.66	[M+H]+	Glycerophospholipids	Glycerophosphocholines	Diacylglycerophosphocholines	PC(42:9)	855.578	1.8
820.584	16.74	[M+H]+	Glycerophospholipids	Glycerophosphocholines	Diacylglycerophosphocholines	PC(39:6)	819.578	1.5
754.538	16.76	[M+H]+	Glycerophospholipids	Glycerophosphocholines	Diacylglycerophosphocholines	PC(34:4)	753.531	0.4
764.52	16.78	[M+H]+	Glycerophospholipids	Glycerophosphocholines	Diacylglycerophosphocholines	PC(35:6)	763.515	2.6
834.601	16.87	[M+H]+	Glycerophospholipids	Glycerophosphocholines	Diacylglycerophosphocholines	PC(40:6)	833.593	0
856.583	16.88	[M+H]+	Glycerophospholipids	Glycerophosphocholines	Diacylglycerophosphocholines	PC(42:9)	855.578	2.6
842.595	16.88	[M+HCOO]-	Glycerophospholipids	Glycerophosphocholines	Diacylglycerophosphocholines	PC(18:1_19:2)	797.593	3.9
878.595	16.89	[M+HCOO]-	Glycerophospholipids	Glycerophosphocholines	Diacylglycerophosphocholines	PC(18:1_22:5)	833.593	3.9
882.601	16.91	[M+H]+	Glycerophospholipids	Glycerophosphocholines	Diacylglycerophosphocholines	PC(44:10)	881.593	0.3
756.554	16.94	[M+H]+	Glycerophospholipids	Glycerophosphocholines	Diacylglycerophosphocholines	PC(34:3)	755.547	0.9
792.554	16.94	[M+H]+	Glycerophospholipids	Glycerophosphocholines	Diacylglycerophosphocholines	PC(37:6)	791.546	0.5
832.584	16.97	[M+H]+	Glycerophospholipids	Glycerophosphocholines	Diacylglycerophosphocholines	PC(40:7)	831.578	1.7
858.601	16.98	[M+H]+	Glycerophospholipids	Glycerophosphocholines	Diacylglycerophosphocholines	PC(42:8)	857.593	0
844.566	17.01	[M+Cl]-	Glycerophospholipids	Glycerophosphocholines	Diacylglycerophosphocholines	PC(18:1_20:3)	809.593	3.9
854.595	17.02	[M+HCOO]-	Glycerophospholipids	Glycerophosphocholines	Diacylglycerophosphocholines	PC(18:1_20:3)	809.593	3.5
796.565	17.04	[M+Cl]-	Glycerophospholipids	Glycerophosphocholines	Diacylglycerophosphocholines	PC(16:0_18:0)	761.593	2.6
720.554	17.1	[M+H]+	Glycerophospholipids	Glycerophosphocholines	Diacylglycerophosphocholines	PC(31:0)	719.547	0.7
980.685	17.1	[M+Cl]-	Glycerophospholipids	Glycerophosphocholines	Diacylglycerophosphocholines	PC(30:5_18:1)	945.719	3.4
856.583	17.16	[M+H]+	Glycerophospholipids	Glycerophosphocholines	Diacylglycerophosphocholines	PC(42:9)	855.578	2.8
834.599	17.16	[M+H]+	Glycerophospholipids	Glycerophosphocholines	Diacylglycerophosphocholines	PC(40:6)	833.593	1.9
846.599	17.17	[M+H]+	Glycerophospholipids	Glycerophosphocholines	Diacylglycerophosphocholines	PC(41:7)	845.593	1.9
788.547	17.2	[M+HCOO]-	Glycerophospholipids	Glycerophosphocholines	Diacylglycerophosphocholines	PC(15:1_18:1)	743.547	2.8
824.616	17.21	[M+H]+	Glycerophospholipids	Glycerophosphocholines	Diacylglycerophosphocholines	PC(39:4)	823.609	0.4
846.581	17.22	[M+Cl]-	Glycerophospholipids	Glycerophosphocholines	Diacylglycerophosphocholines	PC(18:1_20:2)	811.609	3.3
856.61	17.22	[M+HCOO]-	Glycerophospholipids	Glycerophosphocholines	Diacylglycerophosphocholines	PC(20:2_18:1)	811.609	2.9
792.554	17.24	[M+H]+	Glycerophospholipids	Glycerophosphocholines	Diacylglycerophosphocholines	PC(37:6)	791.546	0.1
858.599	17.25	[M+H]+	Glycerophospholipids	Glycerophosphocholines	Diacylglycerophosphocholines	PC(42:8)	857.593	2.3
836.615	17.3	[M+H]+	Glycerophospholipids	Glycerophosphocholines	Diacylglycerophosphocholines	PC(40:5)	835.609	1.1
904.611	17.3	[M+HCOO]-	Glycerophospholipids	Glycerophosphocholines	Diacylglycerophosphocholines	PC(20:1_22:6)	859.609	3.5
884.616	17.33	[M+H]+	Glycerophospholipids	Glycerophosphocholines	Diacylglycerophosphocholines	PC(44:9)	883.609	0.7
794.568	17.36	[M+H]+	Glycerophospholipids	Glycerophosphocholines	Diacylglycerophosphocholines	PC(37:5)	793.562	1.8
862.63	17.41	[M+H]+	Glycerophospholipids	Glycerophosphocholines	Diacylglycerophosphocholines	PC(42:6)	861.625	2.2
886.631	17.44	[M+H]+	Glycerophospholipids	Glycerophosphocholines	Diacylglycerophosphocholines	PC(44:8)	885.625	1
858.626	17.44	[M+HCOO]-	Glycerophospholipids	Glycerophosphocholines	Diacylglycerophosphocholines	PC(18:1_20:1)	813.625	3.3
848.597	17.45	[M+Cl]-	Glycerophospholipids	Glycerophosphocholines	Diacylglycerophosphocholines	PC(20:1_18:1)	813.625	3.3
802.632	17.45	[M+H]+	Glycerophospholipids	Glycerophosphocholines	Diacylglycerophosphocholines	PC(36:1)	801.625	0.2
846.623	17.46	[M+HCOO]-	Glycerophospholipids	Glycerophosphocholines	Diacylglycerophosphocholines	PC(15:1_22:0)	801.625	0.1
882.626	17.47	[M+HCOO]-	Glycerophospholipids	Glycerophosphocholines	Diacylglycerophosphocholines	PC(20:2_20:2)	837.625	3.4
860.638	17.48	[M+HCOO]-	Glycerophospholipids	Glycerophosphocholines	Diacylglycerophosphocholines	PC(18:1_20:0)	815.64	0.8
826.517	17.49	[M+Cl]-	Glycerophospholipids	Glycerophosphocholines	Diacylglycerophosphocholines	PC(17:2_20:4)	791.547	1.2
806.567	17.49	[M+H]+	Glycerophospholipids	Glycerophosphocholines	Diacylglycerophosphocholines	PC(38:6)	805.562	2.5
796.584	17.54	[M+H]+	Glycerophospholipids	Glycerophosphocholines	Diacylglycerophosphocholines	PC(37:4)	795.578	1.8
818.568	17.54	[M+H]+	Glycerophospholipids	Glycerophosphocholines	Diacylglycerophosphocholines	PC(39:7)	817.562	1.8
784.586	17.6	[M+H]+	Glycerophospholipids	Glycerophosphocholines	Diacylglycerophosphocholines	PC(36:3)	783.578	0.7
852.647	17.65	[M+H]+	Glycerophospholipids	Glycerophosphocholines	Diacylglycerophosphocholines	PC(41:4)	851.64	0.7
864.646	17.67	[M+H]+	Glycerophospholipids	Glycerophosphocholines	Diacylglycerophosphocholines	PC(42:5)	863.64	1.4
884.642	17.68	[M+HCOO]-	Glycerophospholipids	Glycerophosphocholines	Diacylglycerophosphocholines	PC(18:0_22:3)	839.64	4
816.648	17.77	[M+H]+	Glycerophospholipids	Glycerophosphocholines	Diacylglycerophosphocholines	PC(38:1)	815.64	0.7
798.601	17.8	[M+H]+	Glycerophospholipids	Glycerophosphocholines	Diacylglycerophosphocholines	PC(37:3)	797.593	0.4
888.647	17.82	[M+H]+	Glycerophospholipids	Glycerophosphocholines	Diacylglycerophosphocholines	PC(44:7)	887.64	0.9
868.681	17.83	[M+H]+	Glycerophospholipids	Glycerophosphocholines	Diacylglycerophosphocholines	PC(42:3)	867.672	1.9
850.613	17.83	[M+Cl]-	Glycerophospholipids	Glycerophosphocholines	Diacylglycerophosphocholines	PC(18:0_20:1)	815.64	4
820.583	17.84	[M+H]+	Glycerophospholipids	Glycerophosphocholines	Diacylglycerophosphocholines	PC(39:6)	819.578	2
876.648	17.84	[M+H]+	Glycerophospholipids	Glycerophosphocholines	Diacylglycerophosphocholines	PC(43:6)	875.64	0.2
774.601	17.86	[M+H]+	Glycerophospholipids	Glycerophosphocholines	Diacylglycerophosphocholines	PC(35:1)	773.593	0.4
864.578	17.87	[M+HCOO]-	Glycerophospholipids	Glycerophosphocholines	Diacylglycerophosphocholines	PC(21:5_18:1)	819.578	2.2
866.662	17.91	[M+H]+	Glycerophospholipids	Glycerophosphocholines	Diacylglycerophosphocholines	PC(42:4)	865.656	1.8
894.625	17.91	[M+HCOO]-	Glycerophospholipids	Glycerophosphocholines	Diacylglycerophosphocholines	PC(23:4_18:1)	849.625	2.1
890.663	17.93	[M+H]+	Glycerophospholipids	Glycerophosphocholines	Diacylglycerophosphocholines	PC(44:6)	889.656	0.8
842.663	17.96	[M+H]+	Glycerophospholipids	Glycerophosphocholines	Diacylglycerophosphocholines	PC(40:2)	841.656	0.4
856.565	18.04	[M+Cl]-	Glycerophospholipids	Glycerophosphocholines	Diacylglycerophosphocholines	PC(21:4_18:1)	821.593	2
866.594	18.05	[M+HCOO]-	Glycerophospholipids	Glycerophosphocholines	Diacylglycerophosphocholines	PC(21:4_18:1)	821.593	2.3
892.679	18.15	[M+H]+	Glycerophospholipids	Glycerophosphocholines	Diacylglycerophosphocholines	PC(44:5)	891.672	0.2
868.678	18.22	[M+H]+	Glycerophospholipids	Glycerophosphocholines	Diacylglycerophosphocholines	PC(42:3)	867.672	0.9
818.663	18.22	[M+H]+	Glycerophospholipids	Glycerophosphocholines	Diacylglycerophosphocholines	PC(38:0)	817.656	0.2
826.632	18.24	[M+H]+	Glycerophospholipids	Glycerophosphocholines	Diacylglycerophosphocholines	PC(39:3)	825.625	0.4
892.61	18.28	[M+HCOO]-	Glycerophospholipids	Glycerophosphocholines	Diacylglycerophosphocholines	PC(23:5_18:1)	847.609	3
882.581	18.29	[M+Cl]-	Glycerophospholipids	Glycerophosphocholines	Diacylglycerophosphocholines	PC(23:5_18:1)	847.609	2.8
844.677	18.38	[M+H]+	Glycerophospholipids	Glycerophosphocholines	Diacylglycerophosphocholines	PC(40:1)	843.672	2
866.662	18.41	[M+H]+	Glycerophospholipids	Glycerophosphocholines	Diacylglycerophosphocholines	PC(42:4)	865.656	2
916.678	18.41	[M+H]+	Glycerophospholipids	Glycerophosphocholines	Diacylglycerophosphocholines	PC(46:7)	915.672	1
818.663	18.42	[M+H]+	Glycerophospholipids	Glycerophosphocholines	Diacylglycerophosphocholines	PC(38:0)	817.656	0.5
894.695	18.47	[M+H]+	Glycerophospholipids	Glycerophosphocholines	Diacylglycerophosphocholines	PC(44:4)	893.687	0.1
824.615	18.49	[M+H]+	Glycerophospholipids	Glycerophosphocholines	Diacylglycerophosphocholines	PC(39:4)	823.609	1.8
882.695	18.5	[M+H]+	Glycerophospholipids	Glycerophosphocholines	Diacylglycerophosphocholines	PC(43:3)	881.687	0
850.631	18.5	[M+H]+	Glycerophospholipids	Glycerophosphocholines	Diacylglycerophosphocholines	PC(41:5)	849.625	1
814.631	18.51	[M+H]+	Glycerophospholipids	Glycerophosphocholines	Diacylglycerophosphocholines	PC(38:2)	813.625	1
868.61	18.57	[M+HCOO]-	Glycerophospholipids	Glycerophosphocholines	Diacylglycerophosphocholines	PC(21:3_18:1)	823.609	2.8
858.581	18.57	[M+Cl]-	Glycerophospholipids	Glycerophosphocholines	Diacylglycerophosphocholines	PC(21:3_18:1)	823.609	2.6
918.693	18.58	[M+H]+	Glycerophospholipids	Glycerophosphocholines	Diacylglycerophosphocholines	PC(46:6)	917.687	1.7
802.632	18.59	[M+H]+	Glycerophospholipids	Glycerophosphocholines	Diacylglycerophosphocholines	PC(37:1)	801.625	0
828.648	18.6	[M+H]+	Glycerophospholipids	Glycerophosphocholines	Diacylglycerophosphocholines	PC(39:2)	827.64	0
884.597	18.61	[M+Cl]-	Glycerophospholipids	Glycerophosphocholines	Diacylglycerophosphocholines	PC(23:4_18:1)	849.625	3
894.626	18.62	[M+HCOO]-	Glycerophospholipids	Glycerophosphocholines	Diacylglycerophosphocholines	PC(23:4_18:1)	835.609	2.9
920.71	18.77	[M+H]+	Glycerophospholipids	Glycerophosphocholines	Diacylglycerophosphocholines	PC(46:5)	919.703	0.5
896.71	18.8	[M+H]+	Glycerophospholipids	Glycerophosphocholines	Diacylglycerophosphocholines	PC(44:3)	895.703	0.1
884.71	18.95	[M+H]+	Glycerophospholipids	Glycerophosphocholines	Diacylglycerophosphocholines	PC(43:2)	883.703	0.2
842.663	18.97	[M+H]+	Glycerophospholipids	Glycerophosphocholines	Diacylglycerophosphocholines	PC(40:2)	841.656	0.3
872.71	19.03	[M+H]+	Glycerophospholipids	Glycerophosphocholines	Diacylglycerophosphocholines	PC(42:1)	871.703	0.4
846.695	19.04	[M+H]+	Glycerophospholipids	Glycerophosphocholines	Diacylglycerophosphocholines	PC(40:0)	845.687	0
918.694	19.1	[M+H]+	Glycerophospholipids	Glycerophosphocholines	Diacylglycerophosphocholines	PC(46:6)	917.687	1
920.71	19.1	[M+H]+	Glycerophospholipids	Glycerophosphocholines	Diacylglycerophosphocholines	PC(46:5)	919.703	0.3
894.694	19.11	[M+H]+	Glycerophospholipids	Glycerophosphocholines	Diacylglycerophosphocholines	PC(44:4)	893.687	0.7
922.657	19.32	[M+HCOO]-	Glycerophospholipids	Glycerophosphocholines	Diacylglycerophosphocholines	PC(25:4_18:1)	877.656	2.9
896.641	19.33	[M+HCOO]-	Glycerophospholipids	Glycerophosphocholines	Diacylglycerophosphocholines	PC(23:3_18:1)	851.64	2.8
886.612	19.33	[M+Cl]-	Glycerophospholipids	Glycerophosphocholines	Diacylglycerophosphocholines	PC(23:3_18:1)	851.64	2.6
898.726	19.34	[M+H]+	Glycerophospholipids	Glycerophosphocholines	Diacylglycerophosphocholines	PC(44:2)	897.719	0.1
922.726	19.45	[M+H]+	Glycerophospholipids	Glycerophosphocholines	Diacylglycerophosphocholines	PC(46:4)	921.719	0.2
886.726	19.45	[M+H]+	Glycerophospholipids	Glycerophosphocholines	Diacylglycerophosphocholines	PC(43:1)	885.719	0.2
896.711	19.49	[M+H]+	Glycerophospholipids	Glycerophosphocholines	Diacylglycerophosphocholines	PC(44:3)	895.703	0.4
948.742	19.62	[M+H]+	Glycerophospholipids	Glycerophosphocholines	Diacylglycerophosphocholines	PC(48:5)	947.734	0.2
924.741	19.62	[M+H]+	Glycerophospholipids	Glycerophosphocholines	Diacylglycerophosphocholines	PC(46:3)	923.734	0.1
856.679	19.66	[M+H]+	Glycerophospholipids	Glycerophosphocholines	Diacylglycerophosphocholines	PC(41:2)	855.672	0.2
900.74	19.81	[M+H]+	Glycerophospholipids	Glycerophosphocholines	Diacylglycerophosphocholines	PC(44:1)	899.734	1.6
922.726	19.99	[M+H]+	Glycerophospholipids	Glycerophosphocholines	Diacylglycerophosphocholines	PC(46:4)	921.719	0.4
976.773	20.01	[M+H]+	Glycerophospholipids	Glycerophosphocholines	Diacylglycerophosphocholines	PC(50:5)	975.766	0
926.758	20.21	[M+H]+	Glycerophospholipids	Glycerophosphocholines	Diacylglycerophosphocholines	PC(46:2)	925.75	0.5
900.742	20.25	[M+H]+	Glycerophospholipids	Glycerophosphocholines	Diacylglycerophosphocholines	PC(44:1)	899.734	0.5
924.743	20.36	[M+H]+	Glycerophospholipids	Glycerophosphocholines	Diacylglycerophosphocholines	PC(46:3)	923.734	1.2
952.774	20.53	[M+H]+	Glycerophospholipids	Glycerophosphocholines	Diacylglycerophosphocholines	PC(48:3)	951.766	1.1
928.774	21.28	[M+H]+	Glycerophospholipids	Glycerophosphocholines	Diacylglycerophosphocholines	PC(46:1)	927.766	0.9
954.79	21.3	[M+H]+	Glycerophospholipids	Glycerophosphocholines	Diacylglycerophosphocholines	PC(48:2)	953.781	1.2
650.512	12.56	[M+H]+	Glycerophospholipids	Glycerophosphocholines	1-alkyl,2-acylglycerophosphocholines	PC(O-27:0)	649.505	0.4
676.528	13.22	[M+H]+	Glycerophospholipids	Glycerophosphocholines	1-alkyl,2-acylglycerophosphocholines/1-(1Z-alkenyl),2-acylglycerophosphocholines	PC(O-29:1) or PC(P-29:0)	675.52	0.6
702.542	13.9	[M+H]+	Glycerophospholipids	Glycerophosphocholines	1-alkyl,2-acylglycerophosphocholines/1-(1Z-alkenyl),2-acylglycerophosphocholines	PC(O-31:2) or PC(P-31:1)	701.536	2.5
678.544	14.04	[M+H]+	Glycerophospholipids	Glycerophosphocholines	1-alkyl,2-acylglycerophosphocholines	PC(O-29:0)	677.536	1
714.542	14.85	[M+H]+	Glycerophospholipids	Glycerophosphocholines	1-alkyl,2-acylglycerophosphocholines/1-(1Z-alkenyl),2-acylglycerophosphocholines	PC(O-32:3) or PC(P-32:2)	713.536	1.1
726.524	14.88	[M+Cl]-	Glycerophospholipids	Glycerophosphocholines	1-alkyl,2-acylglycerophosphocholines	PC(O-16:0_14:0)	691.552	3.9
704.559	14.98	[M+H]+	Glycerophospholipids	Glycerophosphocholines	1-alkyl,2-acylglycerophosphocholines/1-(1Z-alkenyl),2-acylglycerophosphocholines	PC(O-31:1) or PC(P-31:0)	703.552	0.7
740.558	15.01	[M+H]+	Glycerophospholipids	Glycerophosphocholines	1-alkyl,2-acylglycerophosphocholines/1-(1Z-alkenyl),2-acylglycerophosphocholines	PC(O-34:4) or PC(P-34:3)	739.552	1.8
728.56	15.13	[M+H]+	Glycerophospholipids	Glycerophosphocholines	1-alkyl,2-acylglycerophosphocholines/1-(1Z-alkenyl),2-acylglycerophosphocholines	PC(O-33:3) or PC(P-33:2)	727.552	1.1
716.559	15.26	[M+H]+	Glycerophospholipids	Glycerophosphocholines	1-alkyl,2-acylglycerophosphocholines/1-(1Z-alkenyl),2-acylglycerophosphocholines	PC(O-32:2) or PC(P-32:1)	715.552	0.5
704.56	15.3	[M+H]+	Glycerophospholipids	Glycerophosphocholines	1-alkyl,2-acylglycerophosphocholines/1-(1Z-alkenyl),2-acylglycerophosphocholines	PC(O-31:1) or PC(P-31:0)	703.552	1
804.57	15.43	[M+Cl]-	Glycerophospholipids	Glycerophosphocholines	1-alkyl,2-acylglycerophosphocholines/1-(1Z-alkenyl),2-acylglycerophosphocholines	PC(O-36:3) or PC(P-36:2)	769.598	3.1
716.559	15.46	[M+H]+	Glycerophospholipids	Glycerophosphocholines	1-alkyl,2-acylglycerophosphocholines/1-(1Z-alkenyl),2-acylglycerophosphocholines	PC(O-32:2) or PC(P-32:1)	715.552	0.1
706.575	15.57	[M+H]+	Glycerophospholipids	Glycerophosphocholines	1-alkyl,2-acylglycerophosphocholines	PC(O-31:0)	705.567	0.4
764.558	15.61	[M+H]+	Glycerophospholipids	Glycerophosphocholines	1-alkyl,2-acylglycerophosphocholines/1-(1Z-alkenyl),2-acylglycerophosphocholines	PC(O-36:6) or PC(P-36:5)	763.552	0.6
752.539	15.7	[M+Cl]-	Glycerophospholipids	Glycerophosphocholines	1-alkyl,2-acylglycerophosphocholines/1-(1Z-alkenyl),2-acylglycerophosphocholines	PC(O-32:1) or PC(P-32:0)	717.567	3.2
740.557	15.7	[M+H]+	Glycerophospholipids	Glycerophosphocholines	1-alkyl,2-acylglycerophosphocholines/1-(1Z-alkenyl),2-acylglycerophosphocholines	PC(O-34:4) or PC(P-34:3)	739.552	2.1
752.539	15.72	[M+Cl]-	Glycerophospholipids	Glycerophosphocholines	1-alkyl,2-acylglycerophosphocholines/1-(1Z-alkenyl),2-acylglycerophosphocholines	PC(O-32:1) or PC(P-32:0)	717.567	3.3
718.575	15.72	[M+H]+	Glycerophospholipids	Glycerophosphocholines	1-alkyl,2-acylglycerophosphocholines/1-(1Z-alkenyl),2-acylglycerophosphocholines	PC(O-32:1) or PC(P-32:0)	717.567	0.4
754.574	15.87	[M+H]+	Glycerophospholipids	Glycerophosphocholines	1-alkyl,2-acylglycerophosphocholines/1-(1Z-alkenyl),2-acylglycerophosphocholines	PC(O-35:4) or PC(P-35:3)	753.567	0
766.574	15.91	[M+H]+	Glycerophospholipids	Glycerophosphocholines	1-alkyl,2-acylglycerophosphocholines/1-(1Z-alkenyl),2-acylglycerophosphocholines	PC(O-36:5) or PC(P-36:4)	765.567	0.1
742.575	15.92	[M+H]+	Glycerophospholipids	Glycerophosphocholines	1-alkyl,2-acylglycerophosphocholines/1-(1Z-alkenyl),2-acylglycerophosphocholines	PC(O-34:3) or PC(P-34:2)	741.567	0.3
730.575	15.93	[M+H]+	Glycerophospholipids	Glycerophosphocholines	1-alkyl,2-acylglycerophosphocholines/1-(1Z-alkenyl),2-acylglycerophosphocholines	PC(O-33:2) or PC(P-33:1)	729.567	0.2
740.557	16.08	[M+H]+	Glycerophospholipids	Glycerophosphocholines	1-alkyl,2-acylglycerophosphocholines/1-(1Z-alkenyl),2-acylglycerophosphocholines	PC(O-34:4) or PC(P-34:3)	739.552	2
732.59	16.21	[M+H]+	Glycerophospholipids	Glycerophosphocholines	1-alkyl,2-acylglycerophosphocholines/1-(1Z-alkenyl),2-acylglycerophosphocholines	PC(O-33:1) or PC(P-33:0)	731.583	0.4
808.598	16.22	[M+Cl]-	Glycerophospholipids	Glycerophosphocholines	1-alkyl,2-acylglycerophosphocholines/1-(1Z-alkenyl),2-acylglycerophosphocholines	PC(O-36:1) or PC(P-36:0)	773.63	1.6
766.574	16.24	[M+H]+	Glycerophospholipids	Glycerophosphocholines	1-alkyl,2-acylglycerophosphocholines/1-(1Z-alkenyl),2-acylglycerophosphocholines	PC(O-36:5) or PC(P-36:4)	765.567	0.9
742.573	16.28	[M+H]+	Glycerophospholipids	Glycerophosphocholines	1-alkyl,2-acylglycerophosphocholines/1-(1Z-alkenyl),2-acylglycerophosphocholines	PC(O-34:3) or PC(P-34:2)	741.567	2
810.568	16.3	[M+HCOO]-	Glycerophospholipids	Glycerophosphocholines	1-alkyl,2-acylglycerophosphocholines/1-(1Z-alkenyl),2-acylglycerophosphocholines	PC(O-36:5) or PC(P-36:4)	765.567	3.8
764.584	16.32	[M+HCOO]-	Glycerophospholipids	Glycerophosphocholines	1-alkyl,2-acylglycerophosphocholines	PC(O-16:0_16:0)	719.583	3.8
790.574	16.33	[M+H]+	Glycerophospholipids	Glycerophosphocholines	1-alkyl,2-acylglycerophosphocholines/1-(1Z-alkenyl),2-acylglycerophosphocholines	PC(O-38:7) or PC(P-38:6)	789.567	1.2
754.555	16.33	[M+Cl]-	Glycerophospholipids	Glycerophosphocholines	1-alkyl,2-acylglycerophosphocholines	PC(O-16:0_16:0)	719.583	3.7
764.584	16.37	[M+HCOO]-	Glycerophospholipids	Glycerophosphocholines	1-alkyl,2-acylglycerophosphocholines	PC(O-16:0_16:0)	719.583	3.9
768.59	16.55	[M+H]+	Glycerophospholipids	Glycerophosphocholines	1-alkyl,2-acylglycerophosphocholines/1-(1Z-alkenyl),2-acylglycerophosphocholines	PC(O-36:4) or PC(P-36:3)	767.583	0
756.591	16.57	[M+H]+	Glycerophospholipids	Glycerophosphocholines	1-alkyl,2-acylglycerophosphocholines/1-(1Z-alkenyl),2-acylglycerophosphocholines	PC(O-35:3) or PC(P-35:2)	755.583	0.9
792.59	16.65	[M+H]+	Glycerophospholipids	Glycerophosphocholines	1-alkyl,2-acylglycerophosphocholines/1-(1Z-alkenyl),2-acylglycerophosphocholines	PC(O-38:6) or PC(P-38:5)	791.583	0.4
744.59	16.67	[M+H]+	Glycerophospholipids	Glycerophosphocholines	1-alkyl,2-acylglycerophosphocholines/1-(1Z-alkenyl),2-acylglycerophosphocholines	PC(O-34:2) or PC(P-34:1)	743.583	0.2
732.59	16.81	[M+H]+	Glycerophospholipids	Glycerophosphocholines	1-alkyl,2-acylglycerophosphocholines/1-(1Z-alkenyl),2-acylglycerophosphocholines	PC(O-33:1) or PC(P-33:0)	731.583	0.7
794.605	16.93	[M+H]+	Glycerophospholipids	Glycerophosphocholines	1-alkyl,2-acylglycerophosphocholines/1-(1Z-alkenyl),2-acylglycerophosphocholines	PC(O-38:5) or PC(P-38:4)	793.598	1.3
780.571	16.93	[M+Cl]-	Glycerophospholipids	Glycerophosphocholines	1-alkyl,2-acylglycerophosphocholines/1-(1Z-alkenyl),2-acylglycerophosphocholines	PC(O-34:1) or PC(P-34:0)	745.598	3.4
838.6	16.98	[M+HCOO]-	Glycerophospholipids	Glycerophosphocholines	1-alkyl,2-acylglycerophosphocholines/1-(1Z-alkenyl),2-acylglycerophosphocholines	PC(O-38:4) or PC(P-38:3)	793.598	3.9
734.606	16.98	[M+H]+	Glycerophospholipids	Glycerophosphocholines	1-alkyl,2-acylglycerophosphocholines	PC(O-33:0)	733.598	0.9
758.606	17.01	[M+H]+	Glycerophospholipids	Glycerophosphocholines	1-alkyl,2-acylglycerophosphocholines/1-(1Z-alkenyl),2-acylglycerophosphocholines	PC(O-35:2) or PC(P-35:1)	757.598	0.2
718.575	17.02	[M+H]+	Glycerophospholipids	Glycerophosphocholines	1-alkyl,2-acylglycerophosphocholines/1-(1Z-alkenyl),2-acylglycerophosphocholines	PC(O-32:1) or PC(P-32:0)	717.567	0.4
770.606	17.03	[M+H]+	Glycerophospholipids	Glycerophosphocholines	1-alkyl,2-acylglycerophosphocholines/1-(1Z-alkenyl),2-acylglycerophosphocholines	PC(O-36:3) or PC(P-36:2)	769.598	0.5
792.588	17.04	[M+H]+	Glycerophospholipids	Glycerophosphocholines	1-alkyl,2-acylglycerophosphocholines/1-(1Z-alkenyl),2-acylglycerophosphocholines	PC(O-38:6) or PC(P-38:5)	791.583	2.2
782.606	17.12	[M+H]+	Glycerophospholipids	Glycerophosphocholines	1-alkyl,2-acylglycerophosphocholines/1-(1Z-alkenyl),2-acylglycerophosphocholines	PC(O-37:4) or PC(P-37:3)	781.598	0.1
806.606	17.12	[M+H]+	Glycerophospholipids	Glycerophosphocholines	1-alkyl,2-acylglycerophosphocholines/1-(1Z-alkenyl),2-acylglycerophosphocholines	PC(O-39:6) or PC(P-39:5)	805.598	0.3
750.542	17.14	[M+H]+	Glycerophospholipids	Glycerophosphocholines	1-alkyl,2-acylglycerophosphocholines/1-(1Z-alkenyl),2-acylglycerophosphocholines	PC(O-35:6) or PC(P-35:5)	749.536	1.6
794.605	17.16	[M+H]+	Glycerophospholipids	Glycerophosphocholines	1-alkyl,2-acylglycerophosphocholines/1-(1Z-alkenyl),2-acylglycerophosphocholines	PC(O-38:5) or PC(P-38:4)	793.598	1.4
772.62	17.16	[M+H]+	Glycerophospholipids	Glycerophosphocholines	1-alkyl,2-acylglycerophosphocholines/1-(1Z-alkenyl),2-acylglycerophosphocholines	PC(O-36:2) or PC(P-36:1)	771.614	2.2
776.558	17.16	[M+H]+	Glycerophospholipids	Glycerophosphocholines	1-alkyl,2-acylglycerophosphocholines/1-(1Z-alkenyl),2-acylglycerophosphocholines	PC(O-37:7) or PC(P-37:6)	775.552	1.6
762.543	17.18	[M+H]+	Glycerophospholipids	Glycerophosphocholines	1-alkyl,2-acylglycerophosphocholines/1-(1Z-alkenyl),2-acylglycerophosphocholines	PC(O-36:7) or PC(P-37:6)	761.536	0
820.621	17.2	[M+H]+	Glycerophospholipids	Glycerophosphocholines	1-alkyl,2-acylglycerophosphocholines/1-(1Z-alkenyl),2-acylglycerophosphocholines	PC(O-40:6) or PC(P-40:5)	819.614	0.8
816.616	17.2	[M+HCOO]-	Glycerophospholipids	Glycerophosphocholines	1-alkyl,2-acylglycerophosphocholines/1-(1Z-alkenyl),2-acylglycerophosphocholines	PC(O-36:2) or PC(P-36:1)	771.614	3.9
774.541	17.23	[M+H]+	Glycerophospholipids	Glycerophosphocholines	1-alkyl,2-acylglycerophosphocholines/1-(1Z-alkenyl),2-acylglycerophosphocholines	PC(O-37:8) or PC(P-37:7)	773.536	2.3
760.621	17.24	[M+H]+	Glycerophospholipids	Glycerophosphocholines	1-alkyl,2-acylglycerophosphocholines/1-(1Z-alkenyl),2-acylglycerophosphocholines	PC(O-35:1) or PC(P-35:0)	759.614	0.1
864.616	17.26	[M+HCOO]-	Glycerophospholipids	Glycerophosphocholines	1-alkyl,2-acylglycerophosphocholines/1-(1Z-alkenyl),2-acylglycerophosphocholines	PC(O-40:6) or PC(P-40:5)	819.614	3.9
818.605	17.29	[M+H]+	Glycerophospholipids	Glycerophosphocholines	1-alkyl,2-acylglycerophosphocholines/1-(1Z-alkenyl),2-acylglycerophosphocholines	PC(O-40:7) or PC(P-40:6)	817.598	1.7
796.621	17.3	[M+H]+	Glycerophospholipids	Glycerophosphocholines	1-alkyl,2-acylglycerophosphocholines/1-(1Z-alkenyl),2-acylglycerophosphocholines	PC(O-38:4) or PC(P-38:3)	795.614	0.6
810.638	17.32	[M+H]+	Glycerophospholipids	Glycerophosphocholines	1-alkyl,2-acylglycerophosphocholines/1-(1Z-alkenyl),2-acylglycerophosphocholines	PC(O-39:4) or PC(P-39:3)	809.63	0.9
820.62	17.41	[M+H]+	Glycerophospholipids	Glycerophosphocholines	1-alkyl,2-acylglycerophosphocholines/1-(1Z-alkenyl),2-acylglycerophosphocholines	PC(O-40:6) or PC(P-40:5)	819.614	1.1
746.606	17.44	[M+H]+	Glycerophospholipids	Glycerophosphocholines	1-alkyl,2-acylglycerophosphocholines/1-(1Z-alkenyl),2-acylglycerophosphocholines	PC(O-34:1) or PC(P-34:0)	745.598	0.9
844.619	17.48	[M+H]+	Glycerophospholipids	Glycerophosphocholines	1-alkyl,2-acylglycerophosphocholines/1-(1Z-alkenyl),2-acylglycerophosphocholines	PC(O-42:8) or PC(P-42:7)	843.614	2.6
852.682	17.5	[M+H]+	Glycerophospholipids	Glycerophosphocholines	1-alkyl,2-acylglycerophosphocholines/1-(1Z-alkenyl),2-acylglycerophosphocholines	PC(O-42:4) or PC(P-42:3)	851.677	2.9
824.653	17.71	[M+H]+	Glycerophospholipids	Glycerophosphocholines	1-alkyl,2-acylglycerophosphocholines/1-(1Z-alkenyl),2-acylglycerophosphocholines	PC(O-40:4) or PC(P-40:3)	823.645	0.4
788.654	17.83	[M+H]+	Glycerophospholipids	Glycerophosphocholines	1-alkyl,2-acylglycerophosphocholines/1-(1Z-alkenyl),2-acylglycerophosphocholines	PC(O-37:1) or PC(P-37:0)	787.645	1.8
732.59	17.88	[M+H]+	Glycerophospholipids	Glycerophosphocholines	1-alkyl,2-acylglycerophosphocholines/1-(1Z-alkenyl),2-acylglycerophosphocholines	PC(O-33:1) or PC(P-33:0)	731.583	0
846.636	17.89	[M+H]+	Glycerophospholipids	Glycerophosphocholines	1-alkyl,2-acylglycerophosphocholines/1-(1Z-alkenyl),2-acylglycerophosphocholines	PC(O-42:7) or PC(P-42:6)	845.63	1.5
826.667	17.91	[M+H]+	Glycerophospholipids	Glycerophosphocholines	1-alkyl,2-acylglycerophosphocholines/1-(1Z-alkenyl),2-acylglycerophosphocholines	PC(O-40:3) or PC(P-40:2)	825.661	1.3
820.646	17.93	[M+HCOO]-	Glycerophospholipids	Glycerophosphocholines	1-alkyl,2-acylglycerophosphocholines	PC(O-20:0_16:0)	775.645	3.4
852.686	18.04	[M+H]+	Glycerophospholipids	Glycerophosphocholines	1-alkyl,2-acylglycerophosphocholines/1-(1Z-alkenyl),2-acylglycerophosphocholines	PC(O-42:4) or PC(P-42:3)	851.677	2.5
760.62	18.09	[M+H]+	Glycerophospholipids	Glycerophosphocholines	1-alkyl,2-acylglycerophosphocholines/1-(1Z-alkenyl),2-acylglycerophosphocholines	PC(O-35:1) or PC(P-35:0)	759.614	1.8
852.684	18.43	[M+H]+	Glycerophospholipids	Glycerophosphocholines	1-alkyl,2-acylglycerophosphocholines/1-(1Z-alkenyl),2-acylglycerophosphocholines	PC(O-42:4) or PC(P-42:3)	851.677	0.2
774.637	18.47	[M+H]+	Glycerophospholipids	Glycerophosphocholines	1-alkyl,2-acylglycerophosphocholines/1-(1Z-alkenyl),2-acylglycerophosphocholines	PC(O-36:1) or PC(P-36:0)	773.63	0.2
876.683	18.74	[M+H]+	Glycerophospholipids	Glycerophosphocholines	1-alkyl,2-acylglycerophosphocholines/1-(1Z-alkenyl),2-acylglycerophosphocholines	PC(O-44:6) or PC(P-44:5)	875.677	0.7
902.698	18.75	[M+H]+	Glycerophospholipids	Glycerophosphocholines	1-alkyl,2-acylglycerophosphocholines/1-(1Z-alkenyl),2-acylglycerophosphocholines	PC(O-46:7) or PC(P-46:6)	901.692	2.3
854.7	18.75	[M+H]+	Glycerophospholipids	Glycerophosphocholines	1-alkyl,2-acylglycerophosphocholines/1-(1Z-alkenyl),2-acylglycerophosphocholines	PC(O-42:3) or PC(P-42:2)	853.692	0
812.653	18.83	[M+H]+	Glycerophospholipids	Glycerophosphocholines	1-alkyl,2-acylglycerophosphocholines/1-(1Z-alkenyl),2-acylglycerophosphocholines	PC(O-39:3) or PC(P-39:2)	811.645	0.2
830.7	18.88	[M+H]+	Glycerophospholipids	Glycerophosphocholines	1-alkyl,2-acylglycerophosphocholines/1-(1Z-alkenyl),2-acylglycerophosphocholines	PC(O-40:1) or PC(P-40:0)	829.692	0.2
856.715	19.02	[M+H]+	Glycerophospholipids	Glycerophosphocholines	1-alkyl,2-acylglycerophosphocholines/1-(1Z-alkenyl),2-acylglycerophosphocholines	PC(O-42:2) or PC(P-42:1)	855.708	0.1
880.716	19.06	[M+H]+	Glycerophospholipids	Glycerophosphocholines	1-alkyl,2-acylglycerophosphocholines/1-(1Z-alkenyl),2-acylglycerophosphocholines	PC(O-44:4) or PC(P-44:3)	879.708	0.1
882.731	19.27	[M+H]+	Glycerophospholipids	Glycerophosphocholines	1-alkyl,2-acylglycerophosphocholines/1-(1Z-alkenyl),2-acylglycerophosphocholines	PC(O-44:3) or PC(P-44:2)	881.724	0.1
858.731	19.47	[M+H]+	Glycerophospholipids	Glycerophosphocholines	1-alkyl,2-acylglycerophosphocholines/1-(1Z-alkenyl),2-acylglycerophosphocholines	PC(O-42:1) or PC(P-42:0)	857.724	0.3
858.731	19.75	[M+H]+	Glycerophospholipids	Glycerophosphocholines	1-alkyl,2-acylglycerophosphocholines/1-(1Z-alkenyl),2-acylglycerophosphocholines	PC(O-42:1) or PC(P-42:0)	857.724	0.2
886.762	20.51	[M+H]+	Glycerophospholipids	Glycerophosphocholines	1-alkyl,2-acylglycerophosphocholines/1-(1Z-alkenyl),2-acylglycerophosphocholines	PC(O-44:1) or PC(P-44:0)	885.755	0.1
734.497	12.37	[M+H]+	Glycerophospholipids	Glycerophosphoserines	Diacylglycerophosphoserines	PS(32:1)	733.489	0
788.544	14.1	[M+H]+	Glycerophospholipids	Glycerophosphoserines	Diacylglycerophosphoserines	PS(18:1_18:1)	787.536	0.2
840.576	15.69	[M+H]+	Glycerophospholipids	Glycerophosphoserines	Diacylglycerophosphoserines	PS(40:4)	839.568	1
842.591	16.44	[M+H]+	Glycerophospholipids	Glycerophosphoserines	Diacylglycerophosphoserines	PS(40:3)	841.583	0.5
846.623	17.35	[M+H]+	Glycerophospholipids	Glycerophosphoserines	Diacylglycerophosphoserines	PS(18:1_22:0)	845.615	1.6
872.638	17.39	[M+H]+	Glycerophospholipids	Glycerophosphoserines	Diacylglycerophosphoserines	PS(18:1_24:1)	871.63	0.5
454.294	6.05	[M+H]+	Glycerophospholipids	Glycerophosphoethanolamines	Monoacylglycerophosphoethanolamines	LysoPE(16:0_0:0)	453.286	1.7
566.418	12.56	[M+H]+	Glycerophospholipids	Glycerophosphoethanolamines	Monoacylglycerophosphoethanolamines	LysoPE(24:0_0:0)	565.411	0.2
636.46	12.79	[M+H]+	Glycerophospholipids	Glycerophosphoethanolamines	Diacylglycerophosphoethanolamines	PE(28:0)	635.453	0.4
662.476	13.46	[M+H]+	Glycerophospholipids	Glycerophosphoethanolamines	Diacylglycerophosphoethanolamines	PE(30:1)	661.468	1
684.458	13.52	[M+Na]+	Glycerophospholipids	Glycerophosphoethanolamines	Diacylglycerophosphoethanolamines	PE(30:1)	661.468	1.2
662.476	13.71	[M+H]+	Glycerophospholipids	Glycerophosphoethanolamines	Diacylglycerophosphoethanolamines	PE(30:1)	661.468	0.9
664.492	14.32	[M+H]+	Glycerophospholipids	Glycerophosphoethanolamines	Diacylglycerophosphoethanolamines	PE(30:0)	663.484	0.8
712.491	14.53	[M+H]+	Glycerophospholipids	Glycerophosphoethanolamines	Diacylglycerophosphoethanolamines	PE(34:4)	711.484	0.3
702.507	14.86	[M+H]+	Glycerophospholipids	Glycerophosphoethanolamines	Diacylglycerophosphoethanolamines	PE(33:2)	701.5	0.1
690.507	15.01	[M+H]+	Glycerophospholipids	Glycerophosphoethanolamines	Diacylglycerophosphoethanolamines	PE(32:1)	689.5	0.6
770.569	17.44	[M+H]+	Glycerophospholipids	Glycerophosphoethanolamines	Diacylglycerophosphoethanolamines	PE(38:3)	769.562	0
808.62	18.64	[M+H]+	Glycerophospholipids	Glycerophosphoethanolamines	1-(1Z-alkenyl),2-acylglycerophosphoethanolamines	PE(P-18:0_24:4)	807.614	1.6
834.636	18.7	[M+H]+	Glycerophospholipids	Glycerophosphoethanolamines	1-(1Z-alkenyl),2-acylglycerophosphoethanolamines	PE(P-24:1_20:4)	833.63	1
786.637	18.71	[M+H]+	Glycerophospholipids	Glycerophosphoethanolamines	1-(1Z-alkenyl),2-acylglycerophosphoethanolamines	PE(P-18:0_22:1)	785.63	0.1
769.5	13.18	[M+Na]+	Glycerophospholipids	Glycerophosphoglycerols	Diacylglycerophosphoglycerols	PG(34:2)	746.51	0.9
795.515	13.82	[M+Na]+	Glycerophospholipids	Glycerophosphoglycerols	Monoacylglycerophosphomonoradylglycerols	LBPA(18:2_18:1)	772.525	0.6
797.531	14.56	[M+Na]+	Glycerophospholipids	Glycerophosphoglycerols	Monoacylglycerophosphomonoradylglycerols	LBPA(18:1_18:1)	774.541	0.4
1460.06	16.41	[M+H]+	Glycerophospholipids	Glycerophosphoglycerophosphoglycerols	Diacylglycerophosphoglycerophosphodiradylglycerols	CL(72:3)	1459.05	0.8
1399.97	20.67	[M+H]+	Glycerophospholipids	Glycerophosphoglycerophosphoglycerols	Diacylglycerophosphoglycerophosphodiradylglycerols	CL(68:5)	1398.96	1.6
1375.96	20.76	[M+H]+	Glycerophospholipids	Glycerophosphoglycerophosphoglycerols	Diacylglycerophosphoglycerophosphodiradylglycerols	CL(66:3)	1374.96	0.4
1443.01	20.98	[M+NH4]+	Glycerophospholipids	Glycerophosphoglycerophosphoglycerols	Diacylglycerophosphoglycerophosphodiradylglycerols	CL(70:6)	1424.97	1.6
1401.98	21.05	[M+H]+	Glycerophospholipids	Glycerophosphoglycerophosphoglycerols	Diacylglycerophosphoglycerophosphodiradylglycerols	CL(68:4)	1400.97	1.1
1423.96	21.06	[M+Na]+	Glycerophospholipids	Glycerophosphoglycerophosphoglycerols	Diacylglycerophosphoglycerophosphodiradylglycerols	CL(68:4)	1400.97	0.9
1419.01	21.06	[M+NH4]+	Glycerophospholipids	Glycerophosphoglycerophosphoglycerols	Diacylglycerophosphoglycerophosphodiradylglycerols	CL(16:1_18:1_18:1_16:1)	1400.97	1.1
1399.97	21.25	[M+Na]+	Glycerophospholipids	Glycerophosphoglycerophosphoglycerols	Diacylglycerophosphoglycerophosphodiradylglycerols	CL(66:2)	1376.97	2.8
1377.98	21.32	[M+H]+	Glycerophospholipids	Glycerophosphoglycerophosphoglycerols	Diacylglycerophosphoglycerophosphodiradylglycerols	CL(66:2)	1376.97	1.1
1395.01	21.33	[M+NH4]+	Glycerophospholipids	Glycerophosphoglycerophosphoglycerols	Diacylglycerophosphoglycerophosphodiradylglycerols	CL(66:2)	1376.97	2.2
1469.02	21.35	[M+NH4]+	Glycerophospholipids	Glycerophosphoglycerophosphoglycerols	Diacylglycerophosphoglycerophosphodiradylglycerols	CL(72:7)	1450.99	0.4
1471.96	21.45	[M+Na]+	Glycerophospholipids	Glycerophosphoglycerophosphoglycerols	Diacylglycerophosphoglycerophosphodiradylglycerols	CL(72:8)	1448.97	0.9
1445.02	21.46	[M+NH4]+	Glycerophospholipids	Glycerophosphoglycerophosphoglycerols	Diacylglycerophosphoglycerophosphodiradylglycerols	CL(70:5)	1426.99	1
1428	21.47	[M+H]+	Glycerophospholipids	Glycerophosphoglycerophosphoglycerols	Diacylglycerophosphoglycerophosphodiradylglycerols	CL(70:5)	1426.99	0.6
1447.96	21.57	[M+Na]+	Glycerophospholipids	Glycerophosphoglycerophosphoglycerols	Diacylglycerophosphoglycerophosphodiradylglycerols	CL(70:6)	1424.97	1
1421.02	21.58	[M+NH4]+	Glycerophospholipids	Glycerophosphoglycerophosphoglycerols	Diacylglycerophosphoglycerophosphodiradylglycerols	CL(68:3)	1402.99	0.1
1425.98	21.59	[M+Na]+	Glycerophospholipids	Glycerophosphoglycerophosphoglycerols	Diacylglycerophosphoglycerophosphodiradylglycerols	CL(68:3)	1402.99	0.7
1404	21.6	[M+H]+	Glycerophospholipids	Glycerophosphoglycerophosphoglycerols	Diacylglycerophosphoglycerophosphodiradylglycerols	CL(68:3)	1402.99	1
1471.04	21.87	[M+NH4]+	Glycerophospholipids	Glycerophosphoglycerophosphoglycerols	Diacylglycerophosphoglycerophosphodiradylglycerols	CL(72:6)	1453	1.4
1475.99	21.91	[M+Na]+	Glycerophospholipids	Glycerophosphoglycerophosphoglycerols	Diacylglycerophosphoglycerophosphodiradylglycerols	CL(72:6)	1453	1
1454.01	21.94	[M+Na]+	Glycerophospholipids	Glycerophosphoglycerophosphoglycerols	Diacylglycerophosphoglycerophosphodiradylglycerols	CL(70:3)	1431.02	0.3
1451.99	21.98	[M+Na]+	Glycerophospholipids	Glycerophosphoglycerophosphoglycerols	Diacylglycerophosphoglycerophosphodiradylglycerols	CL(18:1_16:1_18:1_18:1)	1429	0.8
1447.04	21.99	[M+NH4]+	Glycerophospholipids	Glycerophosphoglycerophosphoglycerols	Diacylglycerophosphoglycerophosphodiradylglycerols	CL(18:1_16:1_18:1_18:1)	1429	1
1430.01	21.99	[M+Na]+	Glycerophospholipids	Glycerophosphoglycerophosphoglycerols	Diacylglycerophosphoglycerophosphodiradylglycerols	CL(68:1)	1407.02	2.1
1473.98	21.99	[M+Na]+	Glycerophospholipids	Glycerophosphoglycerophosphoglycerols	Diacylglycerophosphoglycerophosphodiradylglycerols	CL(72:7)	1450.99	0
1449.98	22.12	[M+Na]+	Glycerophospholipids	Glycerophosphoglycerophosphoglycerols	Diacylglycerophosphoglycerophosphodiradylglycerols	CL(70:5)	1426.99	1
1406.01	22.22	[M+H]+	Glycerophospholipids	Glycerophosphoglycerophosphoglycerols	Diacylglycerophosphoglycerophosphodiradylglycerols	CL(68:2)	1405	1
1423.04	22.25	[M+NH4]+	Glycerophospholipids	Glycerophosphoglycerophosphoglycerols	Diacylglycerophosphoglycerophosphodiradylglycerols	CL(68:2)	1405	1.3
1406.01	22.27	[M+H]+	Glycerophospholipids	Glycerophosphoglycerophosphoglycerols	Diacylglycerophosphoglycerophosphodiradylglycerols	CL(68:2)	1405	0.1
1478.01	22.46	[M+Na]+	Glycerophospholipids	Glycerophosphoglycerophosphoglycerols	Diacylglycerophosphoglycerophosphodiradylglycerols	CL(72:5)	1455.02	0.9
1473.05	22.46	[M+NH4]+	Glycerophospholipids	Glycerophosphoglycerophosphoglycerols	Diacylglycerophosphoglycerophosphodiradylglycerols	CL(72:5)	1455.02	0.1
1456.03	22.48	[M+Na]+	Glycerophospholipids	Glycerophosphoglycerophosphoglycerols	Diacylglycerophosphoglycerophosphodiradylglycerols	CL(70:2)	1433.03	2.3
1432.03	22.6	[M+H]+	Glycerophospholipids	Glycerophosphoglycerophosphoglycerols	Diacylglycerophosphoglycerophosphodiradylglycerols	CL(70:3)	1431.02	0
1475.99	22.6	[M+Na]+	Glycerophospholipids	Glycerophosphoglycerophosphoglycerols	Diacylglycerophosphoglycerophosphodiradylglycerols	CL(72:6)	1453	0.8
1454.01	22.63	[M+Na]+	Glycerophospholipids	Glycerophosphoglycerophosphoglycerols	Diacylglycerophosphoglycerophosphodiradylglycerols	CL(70:3)	1431.02	1.1
1449.05	22.67	[M+NH4]+	Glycerophospholipids	Glycerophosphoglycerophosphoglycerols	Diacylglycerophosphoglycerophosphodiradylglycerols	CL(70:3)	1431.02	0.5
1502.01	23.06	[M+Na]+	Glycerophospholipids	Glycerophosphoglycerophosphoglycerols	Diacylglycerophosphoglycerophosphodiradylglycerols	CL(74:7)	1479.02	0.1
1480.03	23.09	[M+Na]+	Glycerophospholipids	Glycerophosphoglycerophosphoglycerols	Diacylglycerophosphoglycerophosphodiradylglycerols	CL(72:4)	1457.03	2.1
1475.07	23.1	[M+NH4]+	Glycerophospholipids	Glycerophosphoglycerophosphoglycerols	Diacylglycerophosphoglycerophosphodiradylglycerols	CL(72:4)	1457.03	0.8
1458.04	23.11	[M+H]+	Glycerophospholipids	Glycerophosphoglycerophosphoglycerols	Diacylglycerophosphoglycerophosphodiradylglycerols	CL(72:4)	1457.03	0.2
300.29	6.55	[M+H]+	Sphingolipids	Sphingoid bases	Sphinganines/Sphing-4-enines (Sphingosines)	Sphingosine/3-ketosphinganine	299.282	1.6
300.29	6.94	[M+H]+	Sphingolipids	Sphingoid bases	Sphinganines/Sphing-4-enines (Sphingosines)	Sphingosine/3-ketosphinganine	299.282	2
536.504	12.76	[M+H]+	Sphingolipids	Ceramides	N-acylsphingosines (ceramides)	Cer(d18:1_16:1)	535.496	0.9
538.52	13.49	[M+H]+	Sphingolipids	Ceramides	N-acylsphingosines (ceramides)	Cer(d18:1_16:0)	537.512	1.3
508.473	13.74	[M+H]+	Sphingolipids	Ceramides	N-acylsphingosines (ceramides)	Cer(d18:1_14:1)	507.465	1.2
538.52	14.27	[M+H]+	Sphingolipids	Ceramides	N-acylsphingosines (ceramides)	Cer(d18:1_16:0)	537.512	1.6
510.489	14.85	[M+H]+	Sphingolipids	Ceramides	N-acylsphingosines (ceramides)	Cer(d18:1_14:0)	509.481	0.9
556.531	13.69	[M+H]+	Sphingolipids	Ceramides	N-acylsphinganines (dihydroceramides)	Cer(d18:0_16:0(2OH))	555.523	1.1
540.535	13.89	[M+H]+	Sphingolipids	Ceramides	N-acylsphinganines (dihydroceramides)	Cer(d18:0_16:0)	539.528	0.7
540.535	14.83	[M+H]+	Sphingolipids	Ceramides	N-acylsphinganines (dihydroceramides)	Cer(d18:0_16:0)	539.528	0.7
647.514	10.32	[M+H]+	Sphingolipids	Phosphosphingolipids	Ceramide phosphocholines (sphingomyelins)	SM(30:1)	646.505	2.1
649.529	10.79	[M+H]+	Sphingolipids	Phosphosphingolipids	Ceramide phosphocholines (sphingomyelins)	SM(30:0)	648.521	2.4
673.529	10.85	[M+H]+	Sphingolipids	Phosphosphingolipids	Ceramide phosphocholines (sphingomyelins)	SM(32:2)	672.521	2.2
661.529	10.97	[M+H]+	Sphingolipids	Phosphosphingolipids	Ceramide phosphocholines (sphingomyelins)	SM(31:1)	660.521	2.1
673.529	11.33	[M+H]+	Sphingolipids	Phosphosphingolipids	Ceramide phosphocholines (sphingomyelins)	SM(32:2)	672.521	2
687.544	11.62	[M+H]+	Sphingolipids	Phosphosphingolipids	Ceramide phosphocholines (sphingomyelins)	SM(33:2)	686.536	0.9
675.543	11.69	[M+H]+	Sphingolipids	Phosphosphingolipids	Ceramide phosphocholines (sphingomyelins)	SM(32:1)	674.536	0.2
677.56	12.21	[M+H]+	Sphingolipids	Phosphosphingolipids	Ceramide phosphocholines (sphingomyelins)	SM(32:0)	676.552	0.7
701.559	12.3	[M+H]+	Sphingolipids	Phosphosphingolipids	Ceramide phosphocholines (sphingomyelins)	SM(34:2)	700.552	0.1
689.559	12.39	[M+H]+	Sphingolipids	Phosphosphingolipids	Ceramide phosphocholines (sphingomyelins)	SM(33:1)	688.552	0.1
711.541	12.4	[M+Na]+	Sphingolipids	Phosphosphingolipids	Ceramide phosphocholines (sphingomyelins)	SM(33:0)	688.552	0.3
673.532	12.46	[M-H]-	Sphingolipids	Phosphosphingolipids	Ceramide phosphocholines (sphingomyelins)	SM(d18:0/14:1)	674.536	3.8
701.559	12.73	[M+H]+	Sphingolipids	Phosphosphingolipids	Ceramide phosphocholines (sphingomyelins)	SM(34:2)	700.552	0.4
685.531	12.84	[M-H]-	Sphingolipids	Phosphosphingolipids	Ceramide phosphocholines (sphingomyelins)	SM(33:1)	686.536	3.5
691.575	12.91	[M+H]+	Sphingolipids	Phosphosphingolipids	Ceramide phosphocholines (sphingomyelins)	SM(33:0)	690.568	0
687.547	13.17	[M-H]-	Sphingolipids	Phosphosphingolipids	Ceramide phosphocholines (sphingomyelins)	SM(33:0)	688.552	3.9
727.573	13.64	[M+H]+	Sphingolipids	Phosphosphingolipids	Ceramide phosphocholines (sphingomyelins)	SM(36:3)	726.568	2.8
689.563	13.67	[M-H]-	Sphingolipids	Phosphosphingolipids	Ceramide phosphocholines (sphingomyelins)	SM(33:0)	690.568	4
703.575	13.76	[M+H]+	Sphingolipids	Phosphosphingolipids	Ceramide phosphocholines (sphingomyelins)	SM(34:1)	702.568	0.4
699.544	13.83	[M+H]+	Sphingolipids	Phosphosphingolipids	Ceramide phosphocholines (sphingomyelins)	SM(34:3)	698.536	0.3
729.591	13.84	[M+H]+	Sphingolipids	Phosphosphingolipids	Ceramide phosphocholines (sphingomyelins)	SM(36:2)	728.583	0.7
713.563	13.92	[M-H]-	Sphingolipids	Phosphosphingolipids	Ceramide phosphocholines (sphingomyelins)	SM(d19:1_16:1)	714.568	3.6
751.572	14.33	[M+Na]+	Sphingolipids	Phosphosphingolipids	Ceramide phosphocholines (sphingomyelins)	SM(36:2)	728.583	0.5
729.591	14.34	[M+H]+	Sphingolipids	Phosphosphingolipids	Ceramide phosphocholines (sphingomyelins)	SM(36:2)	728.583	0.9
719.606	14.4	[M+H]+	Sphingolipids	Phosphosphingolipids	Ceramide phosphocholines (sphingomyelins)	SM(35:0)	718.599	0
713.562	14.42	[M-H]-	Sphingolipids	Phosphosphingolipids	Ceramide phosphocholines (sphingomyelins)	SM(d19:1_16:1)	714.568	3
731.606	14.66	[M+H]+	Sphingolipids	Phosphosphingolipids	Ceramide phosphocholines (sphingomyelins)	SM(36:1)	730.599	0.2
715.578	14.68	[M-H]-	Sphingolipids	Phosphosphingolipids	Ceramide phosphocholines (sphingomyelins)	SM(d19:0_16:1)	716.583	3.5
862.626	10.78	[M+H]+	Sphingolipids	Neutral glycosphingolipids	Simple Glc series/Gal- (Gala series)	from Cer(d18:1_16:0)*	861.618	0.9
700.573	10.8	[M+H]+	Sphingolipids	Neutral glycosphingolipids	Simple Glc series/Gal- (Gala series)	from Cer(d18:1_16:0)*	699.565	1.5
862.625	13.45	[M+H]+	Sphingolipids	Neutral glycosphingolipids	Simple Glc series/Gal- (Gala series)	from Cer(d18:1_16:0)*	861.618	0.2
700.573	14.26	[M+H]+	Sphingolipids	Neutral glycosphingolipids	Simple Glc series/Gal- (Gala series)	from Cer(d18:1_16:0)*	699.565	1.2
862.625	12.46	[M+H]+	Sphingolipids	Neutral glycosphingolipids	Simple Glc series/Gal- (Gala series)	from Cer(d18:1_16:0)*	861.618	0.5
1024.68	12.43	[M+H]+	Sphingolipids	Neutral glycosphingolipids	More than two subclasses possible	from Cer(d18:1_16:0)*	1023.67	0.1
1227.76	12.44	[M+H]+	Sphingolipids	Neutral glycosphingolipids	More than two subclasses possible	from Cer(d18:1_16:0)*	1226.75	0.4
1024.68	12.92	[M+H]+	Sphingolipids	Neutral glycosphingolipids	More than two subclasses possible	from Cer(d18:1_16:0)*	1023.67	0.2
1046.66	12.92	[M+Na]+	Sphingolipids	Neutral glycosphingolipids	More than two subclasses possible	from Cer(d18:1_16:0)*	1023.67	0
1255.79	13.86	[M+H]+	Sphingolipids	Neutral glycosphingolipids	More than two subclasses possible	from Cer(d18:1_16:0)*	1254.78	1
1065.7	12.8	[M+H]+	Sphingolipids	Neutral glycosphingolipids	More than two subclasses possible	from Cer(d18:1_16:0)*	1064.7	0.8
1401.85	13.7	[M+H]+	Sphingolipids	Neutral glycosphingolipids	More than two subclasses possible	from Cer(d18:1_16:0)*	1400.84	1.1
651.592	19.79	[M+H]+	Glycerolipids	Diradylglycerols	Diacylglycerols	DG(18:1_20:0_0:0)	650.585	0.3
736.646	22.2	[M+NH4]+	Glycerolipids	Triradylglycerols	Triacylglycerols	TG(10:1_16:0_16:1)	718.611	0.9
812.677	23.31	[M+NH4]+	Glycerolipids	Triradylglycerols	Triacylglycerols	TG(13:0_13:0_22:6)	794.642	1.4
764.676	23.34	[M+NH4]+	Glycerolipids	Triradylglycerols	Triacylglycerols	TG(14:0_14:1_16:1)	746.642	0.2
838.692	23.96	[M+NH4]+	Glycerolipids	Triradylglycerols	Triacylglycerols	TG(10:1_18:0_22:6)	820.658	0.6
749.666	24.13	[M+H]+	Glycerolipids	Triradylglycerols	Triacylglycerols	TG(14:0_14:0_16:1)	748.658	0.4
840.708	24.45	[M+NH4]+	Glycerolipids	Triradylglycerols	Triacylglycerols	TG(14:0_14:1_22:5)	822.674	0.6
842.721	25.02	[M+NH4]+	Glycerolipids	Triradylglycerols	Triacylglycerols	TG(14:0_14:0_22:5)	824.689	2.2
892.74	25.42	[M+NH4]+	Glycerolipids	Triradylglycerols	Triacylglycerols	TG(16:1_16:1_22:6)	874.705	0.6
873.695	25.73	[M+Na]+	Glycerolipids	Triradylglycerols	Triacylglycerols	TG(13:0_19:1_20:5)	850.705	0.8
829.727	26.07	[M+H]+	Glycerolipids	Triradylglycerols	Triacylglycerols	TG(16:1_16:1_18:1)	828.721	1.5
831.744	26.24	[M+H]+	Glycerolipids	Triradylglycerols	Triacylglycerols	TG(16:0_16:1_18:1)	830.736	0.3
833.761	26.53	[M+H]+	Glycerolipids	Triradylglycerols	Triacylglycerols	TG(16:0_16:0_18:1)	832.752	2.3
857.759	26.54	[M+H]+	Glycerolipids	Triradylglycerols	Triacylglycerols	TG(16:1_18:1_18:1)	856.752	0.4
859.774	26.68	[M+H]+	Glycerolipids	Triradylglycerols	Triacylglycerols	TG(16:0_18:1_18:1)	858.768	0.7
968.864	26.76	[M+NH4]+	Glycerolipids	Triradylglycerols	Triacylglycerols	TG(10:1_23:3_26:1)	950.83	0.2
976.833	26.85	[M+NH4]+	Glycerolipids	Triradylglycerols	Triacylglycerols	TG(18:1_20:2_22:5)	958.799	0.1
966.849	26.99	[M+NH4]+	Glycerolipids	Triradylglycerols	Triacylglycerols	TG(20:2_14:0_25:4)	948.815	0.3
1002.85	26.99	[M+NH4]+	Glycerolipids	Triradylglycerols	Triacylglycerols	TG(18:1_22:3_22:5)	984.815	0.3
978.847	27	[M+NH4]+	Glycerolipids	Triradylglycerols	Triacylglycerols	TG(18:1_20:3_22:3)	960.815	1.6
1004.86	27.12	[M+NH4]+	Glycerolipids	Triradylglycerols	Triacylglycerols	TG(18:1_22:3_22:4)	986.83	0.1
985.819	27.15	[M+Na]+	Glycerolipids	Triradylglycerols	Triacylglycerols	TG(18:1_20:2_22:3)	962.83	0.3
1030.88	27.21	[M+NH4]+	Glycerolipids	Triradylglycerols	Triacylglycerols	TG(20:2_22:3_22:4)	1012.85	0
1011.84	27.24	[M+Na]+	Glycerolipids	Triradylglycerols	Triacylglycerols	TG(18:3_22:1_22:3)	988.846	0.3
1006.88	27.25	[M+NH4]+	Glycerolipids	Triradylglycerols	Triacylglycerols	TG(20:2_20:2_22:3)	988.846	1
970.88	27.28	[M+NH4]+	Glycerolipids	Triradylglycerols	Triacylglycerols	TG(18:1_19:1_22:2)	952.846	0.2
1032.9	27.35	[M+NH4]+	Glycerolipids	Triradylglycerols	Triacylglycerols	TG(22:3_18:1_24:4)	1014.86	0.4
1058.91	27.41	[M+NH4]+	Glycerolipids	Triradylglycerols	Triacylglycerols	TG(22:3_22:3_22:3)	1040.88	0.7
1022.91	27.45	[M+NH4]+	Glycerolipids	Triradylglycerols	Triacylglycerols	TG(20:0_22:3_21:3)	1004.88	0.2
1015.87	27.49	[M+H]+	Glycerolipids	Triradylglycerols	Triacylglycerols	TG(18:1_18:1_28:6)	1014.86	2.4
1028.96	27.54	[M+NH4]+	Glycerolipids	Triradylglycerols	Triacylglycerols	TG(18:1_25:1_20:1)	1010.92	0.1
1060.93	27.54	[M+NH4]+	Glycerolipids	Triradylglycerols	Triacylglycerols	TG(18:1_22:3_26:4)	1042.89	0.2
1017.88	27.6	[M+H]+	Glycerolipids	Triradylglycerols	Triacylglycerols	TG(18:1_20:4_26:2)	1016.88	2.7
1062.94	27.64	[M+NH4]+	Glycerolipids	Triradylglycerols	Triacylglycerols	TG(22:3_18:1_26:3)	1044.91	0.4
1026.94	27.68	[M+NH4]+	Glycerolipids	Triradylglycerols	Triacylglycerols	TG(18:1_19:2_26:1)	1008.91	0.8
971.899	27.71	[M+H]+	Glycerolipids	Triradylglycerols	Triacylglycerols	TG(16:0_18:1_26:1)	970.893	0.7
1064.96	27.74	[M+NH4]+	Glycerolipids	Triradylglycerols	Triacylglycerols	TG(18:1_22:4_26:1)	1046.92	1.3
1028.96	27.77	[M+NH4]+	Glycerolipids	Triradylglycerols	Triacylglycerols	TG(18:1_19:1_26:1)	1010.92	0.7
1040.96	27.77	[M+NH4]+	Glycerolipids	Triradylglycerols	Triacylglycerols	TG(18:1_20:2_26:1)	1022.92	0.4
1045.91	27.78	[M+H]+	Glycerolipids	Triradylglycerols	Triacylglycerols	TG(18:1_22:5_26:1)	1044.91	2.6
1068.99	27.94	[M+NH4]+	Glycerolipids	Triradylglycerols	Triacylglycerols	TG(18:1_22:1_26:2)	1050.96	1.9
913.762	26.87	[M+Na]+	Glycerolipids	Triradylglycerols	Alkyldiacylglycerols/1Z-alkenyldiacylglycerols	o-TG(56:7) or p-TG(56:6)	890.773	0.1
693.559	25.73	[M+Na]+	Sterol Lipids	Sterols	Steryl esters	20:5 Cholesteryl ester	670.569	0.9
697.59	26.4	[M+Na]+	Sterol Lipids	Sterols	Steryl esters	20:3 Cholesteryl ester	674.6	0.3
721.589	26.41	[M+Na]+	Sterol Lipids	Sterols	Steryl esters	22:5 Cholesteryl ester	698.6	0.2
673.589	26.66	[M+Na]+	Sterol Lipids	Sterols	Steryl esters	18:1 Cholesteryl ester	650.6	0.1
701.62	27.06	[M+Na]+	Sterol Lipids	Sterols	Steryl esters	20:1 Cholesteryl ester	678.631	0.2
